# Supplementary material for: A Stimuli-Responsive Nanopore Based on a Photoresponsive Host-Guest System
Source: PubMed Central journal article supplement — Sci Rep. 2013 Apr 16;3:1662. doi: 10.1038/srep01662 (PMC3627192; doi:10.1038/srep01662), 2013-04-16
Supplement: srep01662-s1.pdf [file srep01662-s1.pdf]

# Supplementary Information

---

## A Stimuli-Responsive Nanopore Based on a Photoresponsive Host-Guest System

Yi-Lun Ying, Junji Zhang, Fu-Na Meng, Chan Cao, Xuyang Yao, Itamar Willner, He Tian and Yi-Tao Long

---

### Contents

#### Supplementary Figure S1

The raw data, current histograms,  $\tau_{\text{off}}$  histograms and  $\tau_{\text{on}}$  histograms for the blockages by adding the varied concentrations of SC<sub>4</sub> into the *cis* compartment at different holding potentials

#### Supplementary Figure S2

The raw data and  $\tau_{\text{on}}$  histograms for the inhibitions of  $\alpha$ -HL induced by SC<sub>4</sub> in the *trans* compartment at different holding potentials

#### Supplementary Table S1

The fitted parameters of SC<sub>4</sub> induced inhibitions from the *cis* side

#### Supplementary Table S2

The fitted parameters of SC<sub>4</sub> induced inhibitions from the *trans* side

#### Supplementary Figure S3

Histograms of the *trans* side inhibition currents and the scatter plots of reversible *trans* side inhibitions at different potentials

#### Supplementary Figure S4

The  $\tau_{\text{off}}$  histograms for the reversible inhibitions of  $\alpha$ -HL induced by SC<sub>4</sub> in the *trans* compartment at different holding potentials

#### Supplementary Figure S5

Plots of  $\tau_{\text{off}}$  versus the applied potential in the presence of SC<sub>4</sub> at the *trans* compartment

#### Supplementary Figure S6

The scatter plots, current distributions,  $\tau_{\text{off}}$  histograms and  $\tau_{\text{off-P1}}$  histograms for the *trans* side inhibitions of  $\alpha$ -HL at the holding potential of -100 mV in the presence of different concentrations of SC<sub>4</sub>

#### Supplementary Figure S7

The  $\tau_{\text{on}}$  histograms for the *trans* side inhibitions of  $\alpha$ -HL at the holding potential of -100 mV in the presence of different concentrations of SC<sub>4</sub>

#### Supplementary Figure S8

Plots of  $N_{\text{PII}}/N_{\text{PIII}}$  versus the applied potential changing at intervals of 10 mV in the presence of 8.0  $\mu\text{M}$  SC<sub>4</sub> at the *trans* compartment

#### Supplementary Figure S9

Single-channel  $I$ - $V$  curves of  $\alpha$ -HL

**Supplementary Figure S10**

The blockage currents for irreversible inhibitions treated with the repulsive potential

**Supplementary Figure S11**

$^1\text{H}$  NMR spectra (400MHz,  $\text{D}_2\text{O}$ , 298K) changes of  $\text{V}^{2+}$ -*trans*-Az after complexation with  $\text{SC}_4$

**Supplementary Figure S12**

$^1\text{H}$  NMR spectra (400MHz,  $\text{D}_2\text{O}$ , 298K) changes of  $\text{V}^+$  after complexation with  $\text{SC}_4$

**Supplementary Figure S13**

$\tau_{\text{on}}$  histograms for the inhibitions of  $\alpha$ -HL in the presence of the host-guest complex in the *trans* compartment at the holding potential of -140 mV

**Supplementary Figure S14**

$^1\text{H}$  NMR spectra (400MHz,  $\text{D}_2\text{O}$ , 298K) of  $\text{V}^{2+}$ -*trans*-Az and isomerization from  $\text{V}^{2+}$ -*trans*-Az to  $\text{V}^{2+}$ -*cis*-Az after irradiation

**Supplementary Figure S15**

$^1\text{H}$  NMR spectra (400MHz,  $\text{D}_2\text{O}$ , 298K) of isomerization from  $\text{SC}_4:\text{V}^{2+}$ -*trans*-Az to  $\text{SC}_4:\text{V}^{2+}$ -*cis*-Az after irradiation for 30 min

**Supplementary Figure S16**

The current traces recording at the holding potential of -100 mV with and without UV irradiation

**Supplementary Figure S17**

UV-*vis* spectra for the photoisomerization of  $\text{SC}_4:\text{V}^{2+}$ -Az

**Supplementary Figure S18**

$^1\text{H}$ -NMR spectra (400MHz,  $\text{D}_2\text{O}$ , 298K) of  $\text{SC}_4$ ,  $\text{V}^{2+}$ -*trans*-Az and  $\text{SC}_4:\text{V}^{2+}$ -*trans*-Az

**Supplementary Figure S19**

$^{13}\text{C}$ -NMR spectrum (400MHz,  $\text{DMSO-d}_6$ , 298K) of  $\text{V}^{2+}$ -*trans*-Az

**Supplementary Figure S20**

ESI-MS spectrum of  $\text{V}^{2+}$ -*trans*-Az

**Supplementary Figure S21**

$^1\text{H}$ -NMR spectrum (400MHz,  $\text{D}_2\text{O}$ , 298K) of  $\text{V}^+$

# 1. The close-states of $\alpha$ -hemolysin induced by *para*-sulfonato-calix[4]arene

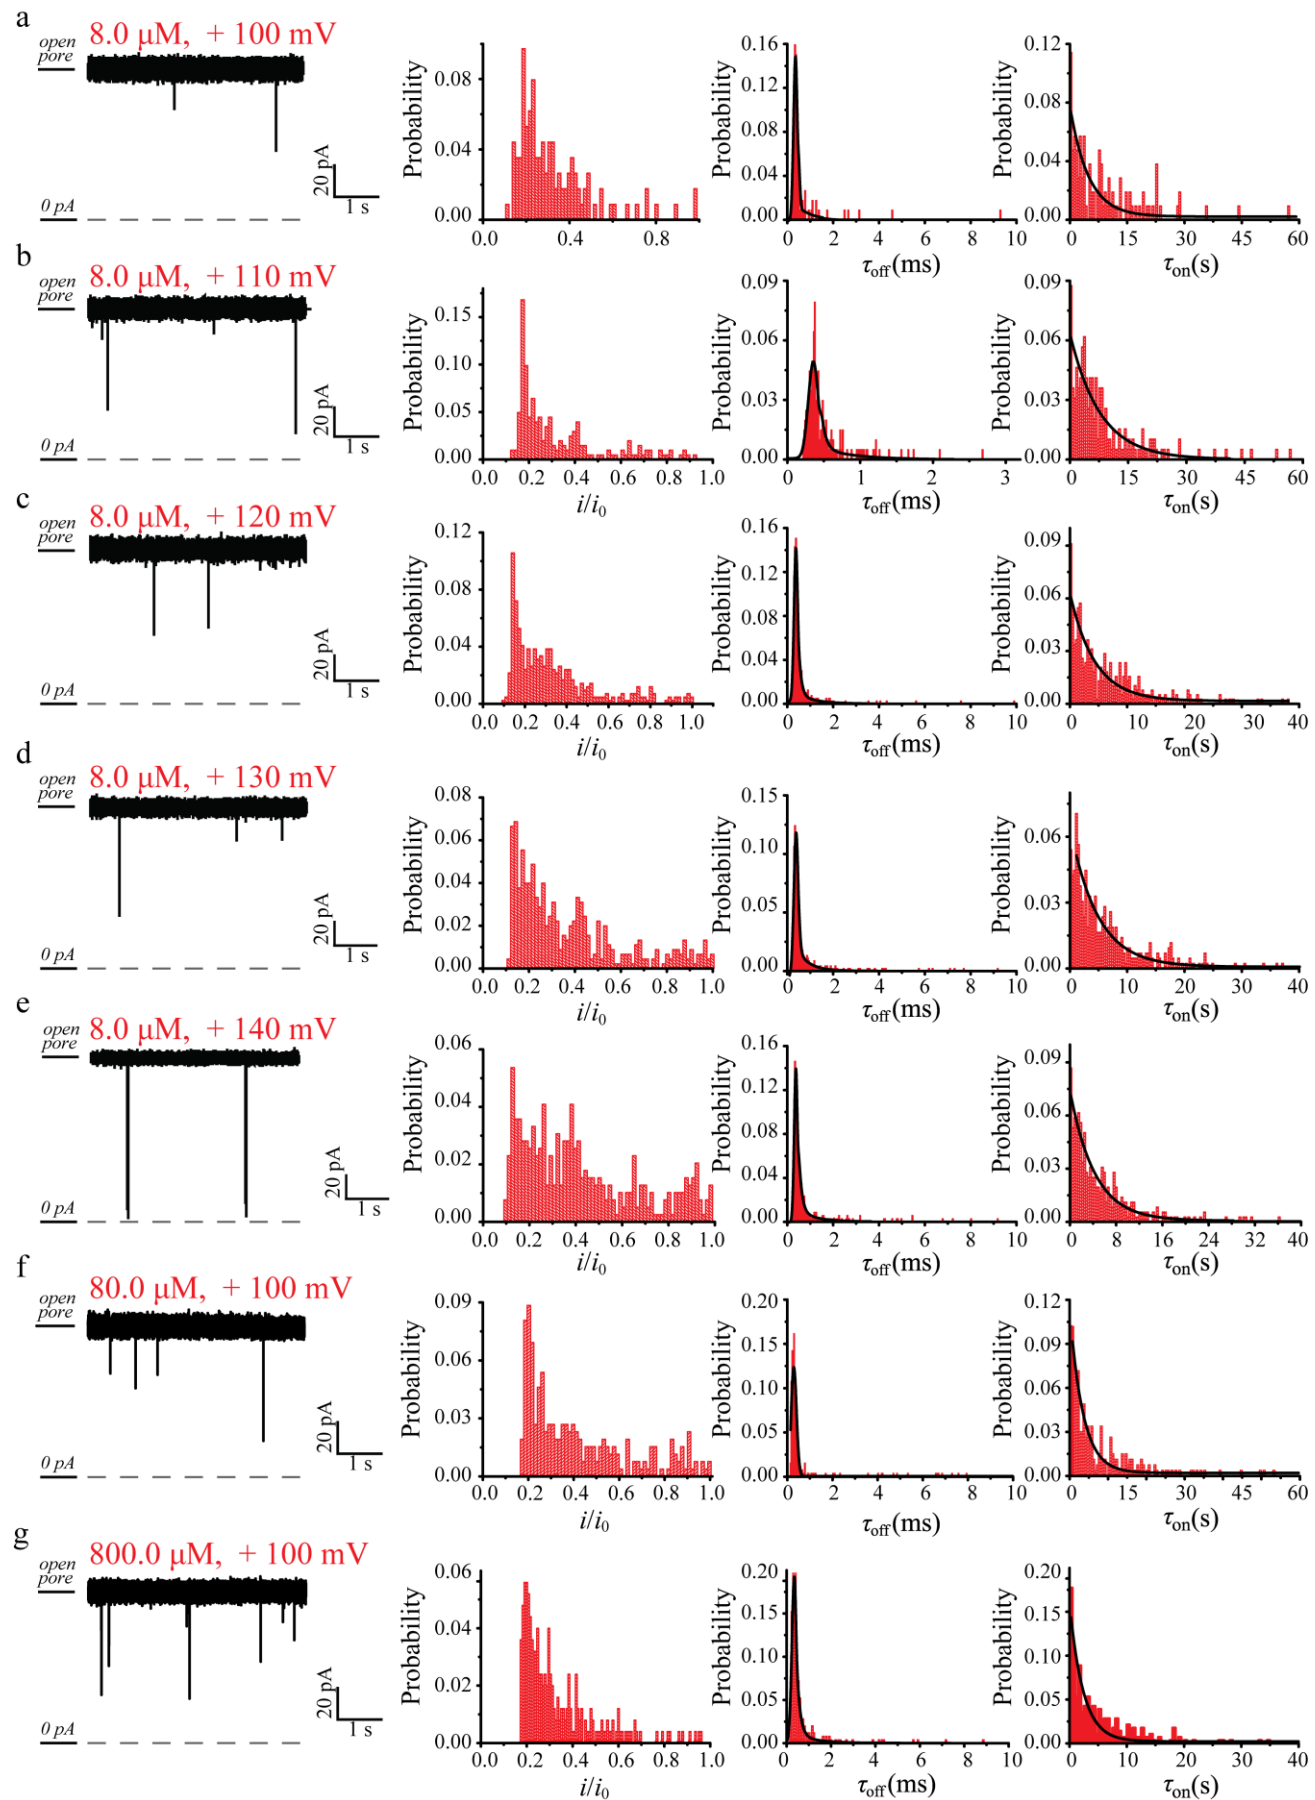

Supplementary Figure S1 | The raw data, current histograms,  $\tau_{\text{off}}$  histograms and  $\tau_{\text{on}}$  histograms for the blockages

by adding the varied concentrations of SC<sub>4</sub> into the *cis* compartment at different holding potentials (V<sub>h</sub>). (a) [SC<sub>4</sub>] = 8.0 μM, V<sub>h</sub> = + 100 mV, (b) [SC<sub>4</sub>] = 8.0 μM, V<sub>h</sub> = + 110 mV, (c) [SC<sub>4</sub>] = 8.0 μM, V<sub>h</sub> = +120 mV, (d) [SC<sub>4</sub>] = 8.0 μM, V<sub>h</sub> = +130 mV, (e) [SC<sub>4</sub>] = 8.0 μM, V<sub>h</sub> = +140 mV, (f) [SC<sub>4</sub>] = 80.0 μM, V<sub>h</sub> = +100 mV and (g) [SC<sub>4</sub>] = 800.0 μM, V<sub>h</sub> = +100 mV. The transient and reversible close-states were retained even at an extreme holding potential of +140 mV. The curves of the τ<sub>off</sub> histograms for the concentration of SC<sub>4</sub> at 8.0 μM follow a relatively steep rise and fall, but for times greater than the peak values are well approximated by single-exponential decays. For the concentration of SC<sub>4</sub> at 80.0 μM and 800.0 μM, Gaussian distributions of durations were observed. τ<sub>on</sub> histograms are approximated by single-exponential decays.

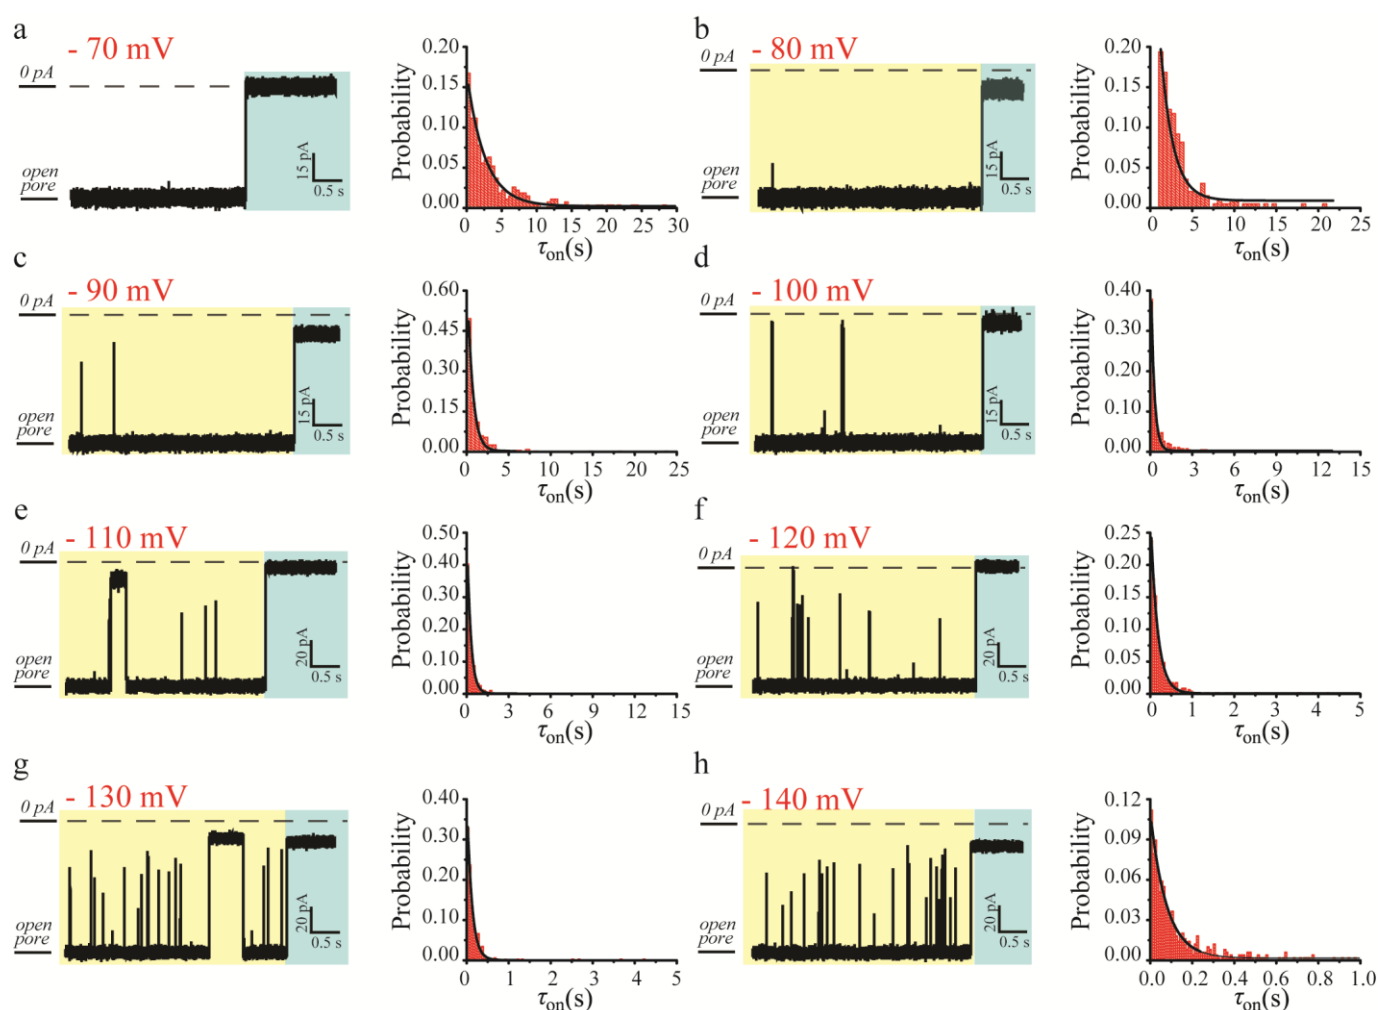

**Supplementary Figure S2 | The raw data and τ<sub>on</sub> histograms for the inhibitions of α-HL induced by the addition of SC<sub>4</sub> (8.0 μM) into the *trans* compartment at different holding potentials: (a) -70 mV, (b) -80 mV, (c) -90 mV, (d) -100 mV, (e) -110 mV, (f) -120 mV, (g) -130 mV and (h) -140 mV. Yellow and blue rectangle boxes represent the reversible and irreversible inhibitions, respectively. τ<sub>on</sub> histograms are approximated by single-exponential decays.**

**Supplementary Table S1 | The fitted parameters of SC<sub>4</sub> induced inhibitions from the *cis* side.**

| [SC <sub>4</sub> ]<br>(μM) | Potential<br>(mV) | $\tau_{\text{on}}^{\text{a}}$<br>(s) | $\tau_{\text{off-1}}^{\text{b}}$<br>(ms) | $\tau_{\text{off-2}}^{\text{b}}$<br>(ms) |
|----------------------------|-------------------|--------------------------------------|------------------------------------------|------------------------------------------|
| 8.0                        | +100              | 4.86 ± 0.50                          | 0.36 ± 0.01                              | 0.58 ± 0.02                              |
| 8.0                        | +110              | 4.45 ± 1.10                          | 0.36 ± 0.02                              | 0.51 ± 0.03                              |
| 8.0                        | +120              | 4.35 ± 0.42                          | 0.38 ± 0.02                              | 0.79 ± 0.04                              |
| 8.0                        | +130              | 4.79 ± 0.50                          | 0.38 ± 0.03                              | 0.51 ± 0.02                              |
| 8.0                        | +140              | 4.26 ± 0.38                          | 0.37 ± 0.02                              | 0.78 ± 0.03                              |
| 80.0                       | +100              | 4.76 ± 0.47                          | 0.34 ± 0.02                              | n.a.                                     |
| 800.0                      | +100              | 4.75 ± 0.53                          | 0.34 ± 0.02                              | n.a.                                     |

<sup>a</sup> The values of  $\tau_{\text{on}}$  are carried out for all the events including reversible and irreversible inhibitions, and obtained by single-exponential fittings. <sup>b</sup> The values of  $\tau_{\text{off-1}}$  and  $\tau_{\text{off-2}}$  for *cis* side inhibitions at [SC<sub>4</sub>] = 8.0 μM are fitted by Gaussian functions following by single-exponential equations. The durations for *cis* side inhibitions at [SC<sub>4</sub>] = 80.0 μM and 800.0 μM are fitted by Gaussian functions. Data of the values were based on three separate experiments.

**Supplementary Table S2 | The fitted parameters of SC<sub>4</sub> induced inhibitions from the *trans* side.**

| [SC <sub>4</sub> ]<br>(μM) | Potential<br>(mV) | $\tau_{\text{on}}^{\text{a}}$<br>(s) | $\tau_{\text{off-1}}^{\text{b}}$<br>(ms) | $\tau_{\text{off-2}}^{\text{b}}$<br>(ms) | $\tau_{\text{off-PI}}^{\text{c}}$<br>(ms) |
|----------------------------|-------------------|--------------------------------------|------------------------------------------|------------------------------------------|-------------------------------------------|
| 8.0                        | -70               | 2.61 ± 0.70                          | 0.30 ± 0.04                              | n.a.                                     | 0.28 ± 0.04                               |
| 8.0                        | -80               | 1.49 ± 0.50                          | 0.32 ± 0.03                              | n.a.                                     | 0.28 ± 0.05                               |
| 8.0                        | -90               | 0.62 ± 0.32                          | 0.30 ± 0.02                              | 2.62 ± 0.28                              | 0.23 ± 0.05                               |
| 8.0                        | -100              | 0.49 ± 0.24                          | 0.37 ± 0.03                              | 2.92 ± 0.30                              | 0.31 ± 0.04                               |
| 8.0                        | -110              | 0.27 ± 0.15                          | 0.60 ± 0.04                              | 3.18 ± 0.31                              | 0.29 ± 0.05                               |
| 8.0                        | -120              | 0.17 ± 0.07                          | 0.35 ± 0.02                              | 2.64 ± 0.35                              | 0.36 ± 0.05                               |
| 8.0                        | -130              | 0.12 ± 0.04                          | 0.43 ± 0.03                              | 3.02 ± 0.32                              | 0.35 ± 0.04                               |
| 8.0                        | -140              | 0.07 ± 0.02                          | 0.36 ± 0.04                              | 3.51 ± 0.34                              | 0.25 ± 0.05                               |
| 0.8                        | -100              | 8.14 ± 0.75                          | 0.34 ± 0.75                              | n.a.                                     | 0.28 ± 0.03                               |
| 4.0                        | -100              | 2.01 ± 0.24                          | 0.38 ± 0.34                              | n.a.                                     | 0.26 ± 0.04                               |

<sup>a</sup> The values of  $\tau_{\text{on}}$  were carried out for all the events including reversible and irreversible inhibitions. The values of  $\tau_{\text{on}}$  are obtained by single-exponential fittings. <sup>b</sup> The values of  $\tau_{\text{off-1}}$  and  $\tau_{\text{off-2}}$  for *trans* side reversible inhibitions are calculated by di-exponential decays at the holding potentials ranging from -90 mV to -140 mV with the concentration of SC<sub>4</sub> at 8.0 μM. The histograms for the duration time of the reversible inhibitions at the holding potentials of -70 mV and -80 mV with [SC<sub>4</sub>] = 8.0 μM are fitted by the single-exponential equations giving the values of  $\tau_{\text{off-1}}$ . The values of  $\tau_{\text{off-1}}$  for the concentration of SC<sub>4</sub> at 0.8 μM and 4.0 μM are obtained by single-exponential equations. <sup>c</sup> The values of  $\tau_{\text{off-PI}}$  representing duration time of the reversible events at PI are fitted by single-exponential equations. Data of the values were based on three separate experiments. Since the values of  $\tau_{\text{off-PI}}$  are close to the values of  $\tau_{\text{off-1}}$ ,  $\tau_{\text{off-2}}$  represent the fitted long duration time for the inhibitions in PII and PIII.

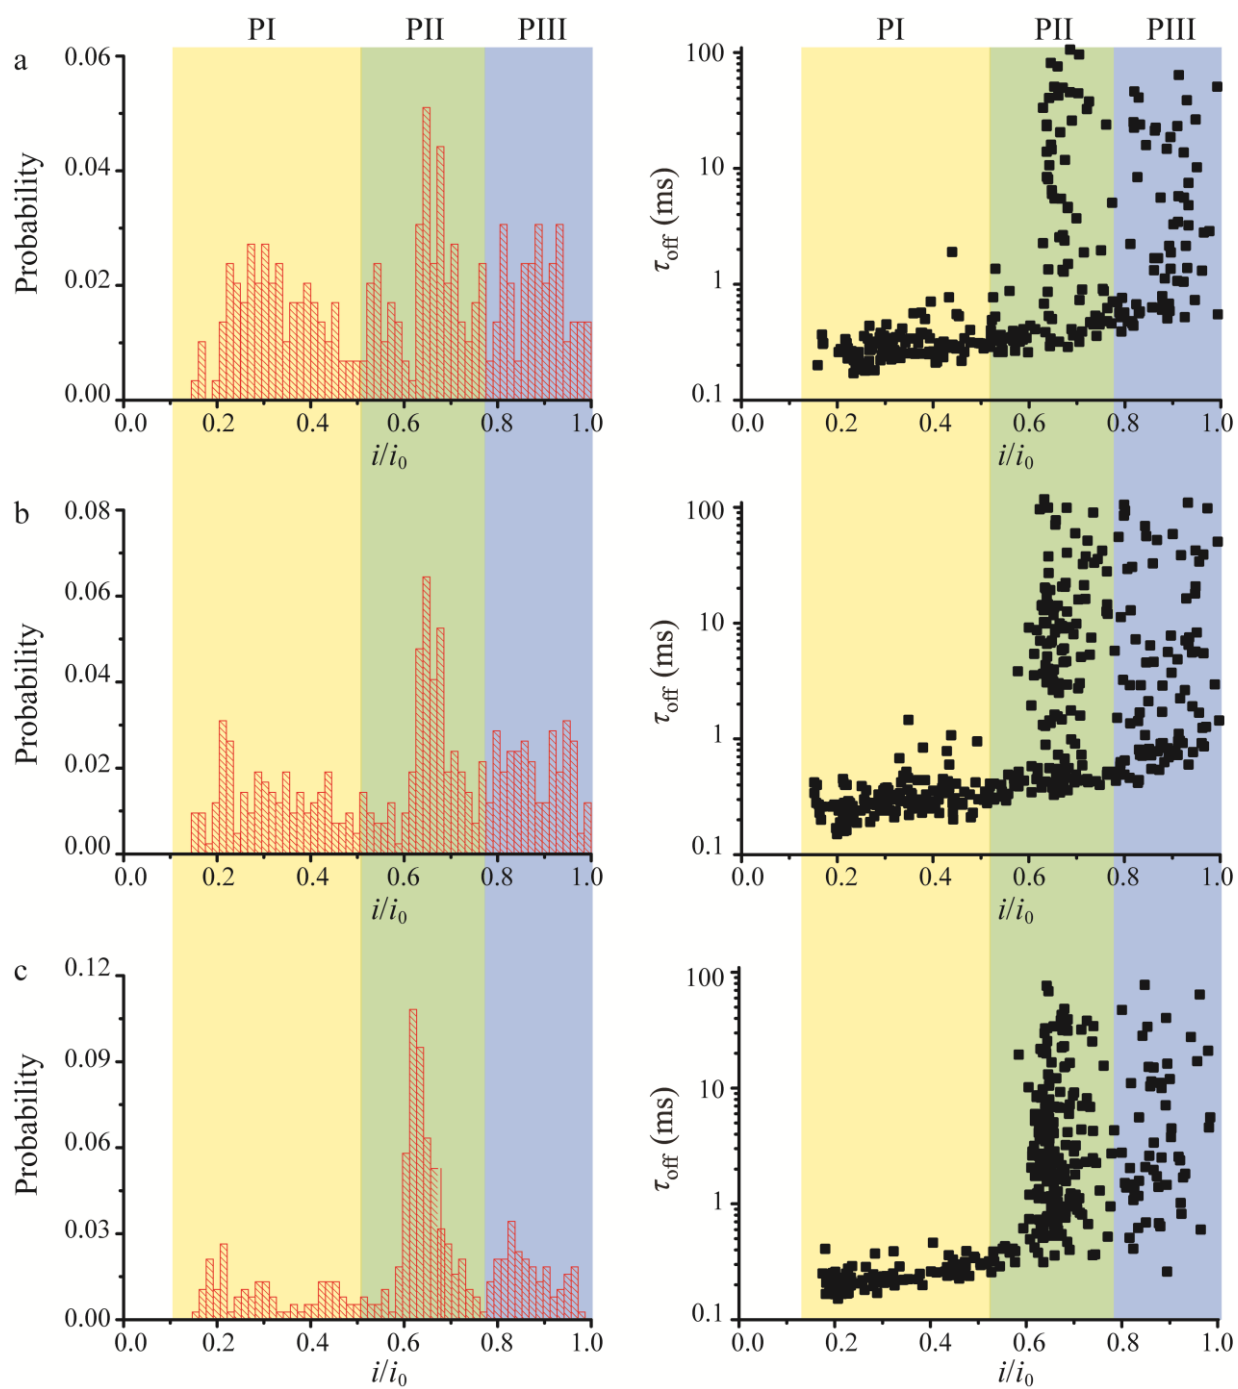

**Supplementary Figure S3 | Histograms of the *trans* side inhibition currents and the scatter plots of reversible *trans* side inhibitions at different potentials: (a) -70 mV, (b) -80 mV and (c) -90 mV. The inhibitions fall into three populations which are assigned to PI, PII and PIII, respectively. The ratios for the events in PI from the total events are 0.55, 0.34, 0.22 at the potential of -70 mV, -80 mV and -90 mV, respectively. The histograms of the inhibition currents include reversible and irreversible inhibitions.**

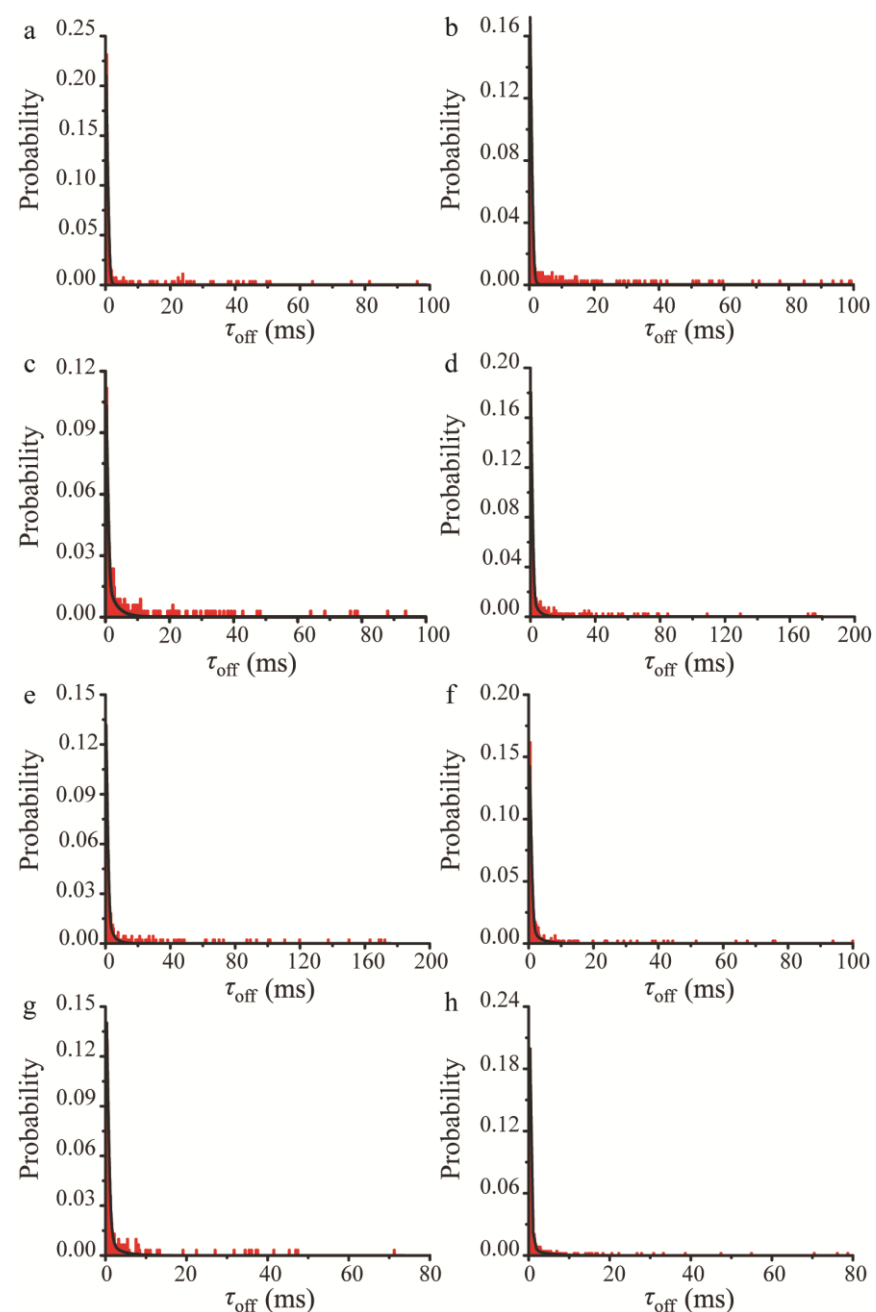

**Supplementary Figure S4 | The  $\tau_{\text{off}}$  histograms for the reversible inhibitions of  $\alpha$ -HL induced by the addition of  $\text{SC}_4$  ( $8.0 \mu\text{M}$ ) into the *trans* compartment at different holding potentials: (a) -70 mV, (b) -80 mV, (c) -90 mV, (d) -100 mV, (e) -110 mV, (f) -120 mV, (g) -130 mV and (h) -140 mV. The  $\tau_{\text{off}}$  histograms for holding potentials at -70 mV and -80 mV are fitted by single-exponential decays. The histograms of reversible inhibitions for the *trans* side assays are fitted by double-exponential equations at holding potentials ranging from -90 mV to -140 mV.**

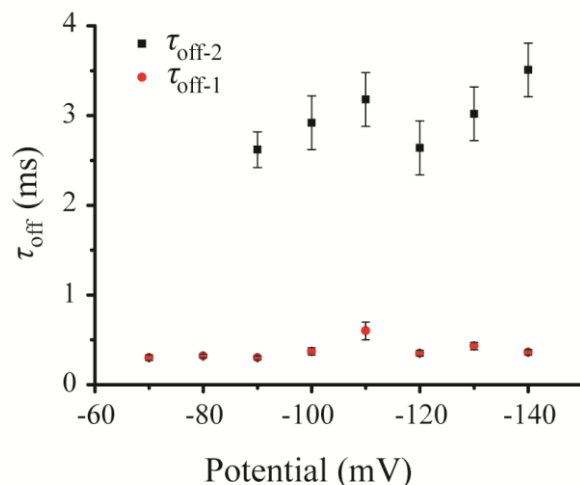

**Supplementary Figure S5 | Plots of  $\tau_{\text{off}}$  versus the applied potential changing at intervals of 10 mV in the presence of  $\text{SC}_4$  at the *trans* compartment.** The plot of  $\tau_{\text{off-1}}$  is down in red and the plot of  $\tau_{\text{off-2}}$  is up in black. Since  $\alpha$ -HL consists of an assembly of seven monomers, the periodic change of  $\tau_{\text{off-2}}$  with the increased negative holding potential might be caused by the inhibitions at different binding ratio. Other factors including the protonation of the residues in  $\alpha$ -HL and simultaneous multiple bindings may affect the relationship between  $\tau_{\text{off-2}}$  and the applied potential, which needs further studies.

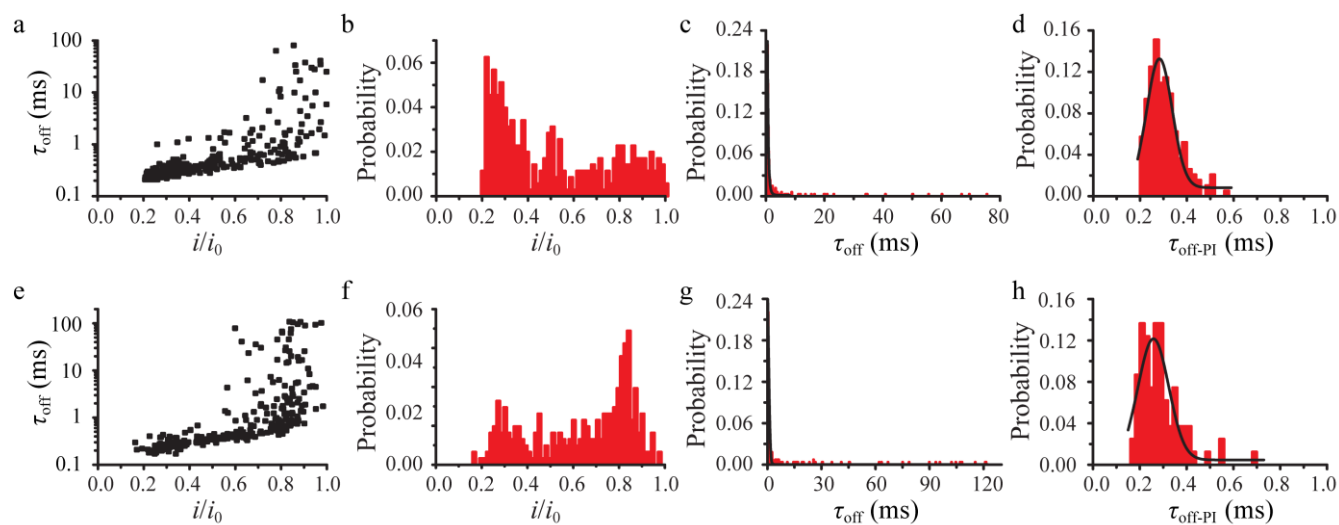

**Supplementary Figure S6 | The scatter plots, current distributions,  $\tau_{\text{off}}$  histograms and  $\tau_{\text{off-PI}}$  histograms for the *trans* side inhibitions of  $\alpha$ -HL at the holding potential of -100 mV in the presence of different concentrations of  $\text{SC}_4$ :** (a) ~ (d) 0.8  $\mu\text{M}$ , (e) ~ (h) 4  $\mu\text{M}$ .  $\tau_{\text{off}}$  histograms are approximated by single-exponential decays. The curves of the durations in PI are fitted by Gaussian functions. The ratios for the events in PI from the total events are 0.58 and 0.30 for the concentrations of  $\text{SC}_4$  at 0.8 and 4.0  $\mu\text{M}$ , respectively.



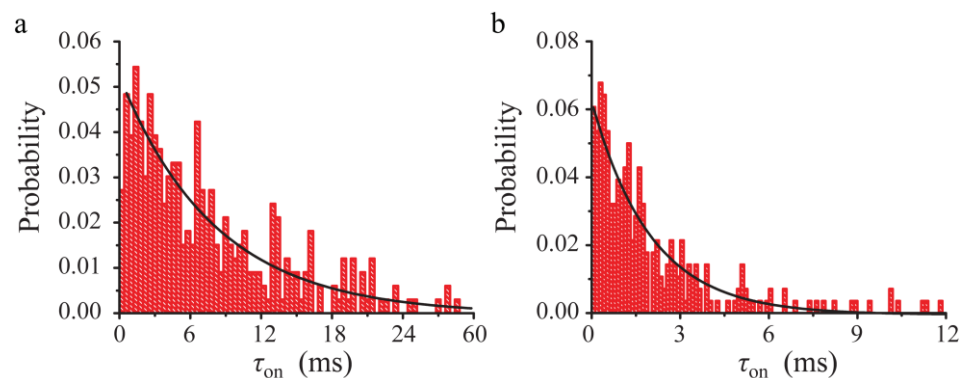

**Supplementary Figure S7 | The  $\tau_{on}$  histograms for the *trans* side inhibitions of  $\alpha$ -HL at the holding potential of -100 mV in the presence of different concentrations of SC<sub>4</sub>: (a) 0.8  $\mu\text{M}$ , (b) 4  $\mu\text{M}$ .  $\tau_{on}$  histograms are approximated by single-exponential decays.**

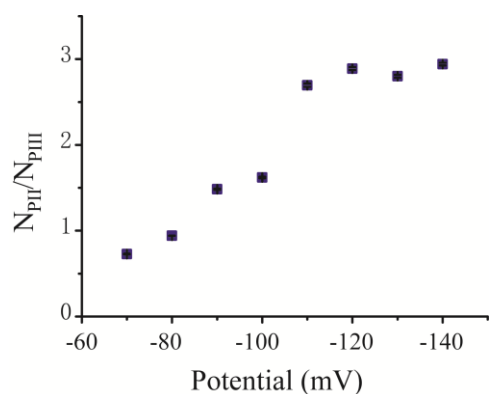

**Supplementary Figure S8 | Plots of  $N_{PII}/N_{PIII}$  versus the applied potential changing at intervals of 10 mV in the presence of 8.0  $\mu\text{M}$  SC<sub>4</sub> at the *trans* compartment. The counts of events in PII and PIII were based on the Gaussian distributions of current histograms.**

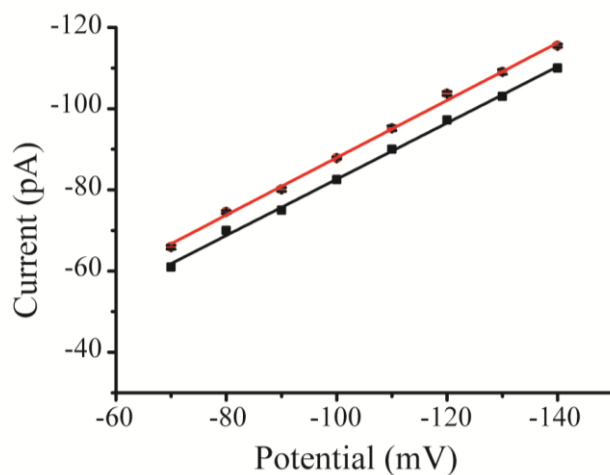

**Supplementary Figure S9 | Single-channel  $I$ - $V$  curves of  $\alpha$ -HL.  $I$ - $V$  curves before (black) and after addition of SC<sub>4</sub> into the *trans* compartment in 3000 s (red).**

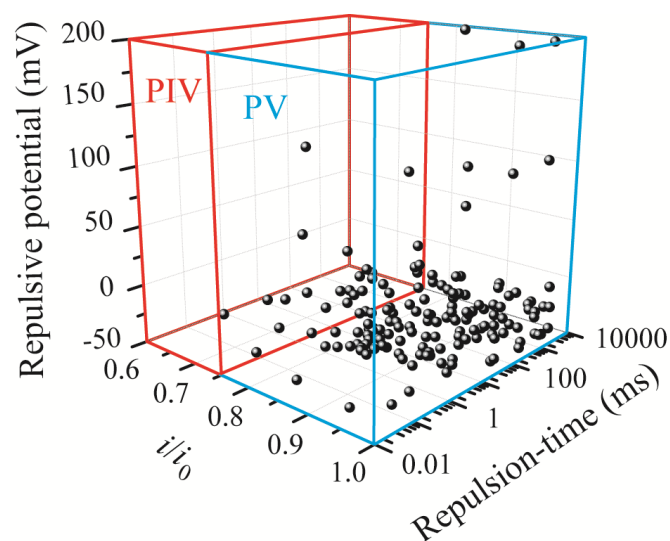

**Supplementary Figure S10 | The blockage currents for irreversible inhibitions at the holding potential from -70 mV to -140 mV, treated with the repulsive potential.** SC<sub>4</sub> would be relieved from the  $\alpha$ -HL after undergoing the certain repulsion-time. The irreversible inhibitions are divided into two populations PIV and PV. It should be noted that the close-states with the higher inhibition currents exhibit more positive repulsive potentials and higher values of repulsion-time as PIV, and vice versa as PV.

## 2. Binding behavior between SC<sub>4</sub> and V<sup>2+</sup>-*trans*-Az

The formation of the inclusion complex between SC<sub>4</sub> and guest molecule V<sup>2+</sup>-*trans*-Az is evident in <sup>1</sup>H NMR spectroscopic experiment in D<sub>2</sub>O (Supplementary Fig. S11). In the presence of SC<sub>4</sub>, all the protons of V<sup>2+</sup>-*trans*-Az exhibit a visible upfield shift ( $\Delta\delta$ ) owing to the ring current effect of the aromatic nuclei, which suggests that the V<sup>2+</sup>-*trans*-Az guest is encapsulated into the cavity of SC<sub>4</sub>. However, the  $\Delta\delta$  value for each proton is different, which can be used as a powerful evidence to deduce the host-guest binding manner.<sup>47</sup> As can be seen from Supplementary Fig. S10, protons on the methyl group of pyridinium (g) perform the most significant upfield shift from  $\delta = 4.37$  ppm to  $\delta = 1.58$  ppm after complexation, while protons on the methylene group (c, from  $\delta = 5.90$  to  $\delta = 5.78$ ) and acetyl methyl group (f, from  $\delta = 2.26$  to  $\delta = 2.24$ ) hardly change their places. Supplementary Figure S11 shows the chemical shift of hydrogens on the viologen and azobenzene moieties. The proton a-H, which is adjacent to pyridinium methyl group, shifts significantly to upfield, from  $\delta = 8.93$  to  $\delta = 6.62$ . The proton b-H shows a relatively mild upfield shift from  $\delta = 8.40$  to  $\delta = 7.40$ . Compared to the protons a-H and b-H, their counterparts on the other pyridinium part of viologen moiety (a'-H and b'-H) show only minute upfield shift (b'-H from  $\delta = 9.10$  to  $\delta = 8.90$ ; a'-H from  $\delta = 8.46$  to  $\delta = 8.11$ ) while protons on the azobenzene moiety (d-H, d'-H, e-H and e'-H) stay the same. The  $\Delta\delta$  value of V<sup>2+</sup>-*trans*-Az protons are in the order of CH<sub>3</sub>(pyri, g-H) > a-H > b-H >> b'-H > a'-H > other protons, which indicates that V<sup>2+</sup>-*trans*-Az is immersed into the cavity of SC<sub>4</sub> in its axial orientation with the methyl group being included first. The electrostatic interactions contribute favorably to the binding affinity between SC<sub>4</sub> and V<sup>2+</sup>-*trans*-Az. In neutral (or the basic) solution, some of the phenolic hydroxyls of

calixarenes begin to be deprotonated.<sup>51</sup> Therefore, the electron-rich cavities of calixarenes are capable of providing  $\pi$ -stacking interaction. In the research of Liu et al.<sup>47</sup>, SC<sub>4</sub> shows the  $\pi$ -stacking interaction towards the methyl viologen (MV<sup>2+</sup>) besides the electrostatic interactions at the pH = 7.2. Thus, the  $\pi$ -stacking interactions exist between SC<sub>4</sub> and V<sup>2+</sup>-*trans*-Az besides the major effect of electrostatic interactions.

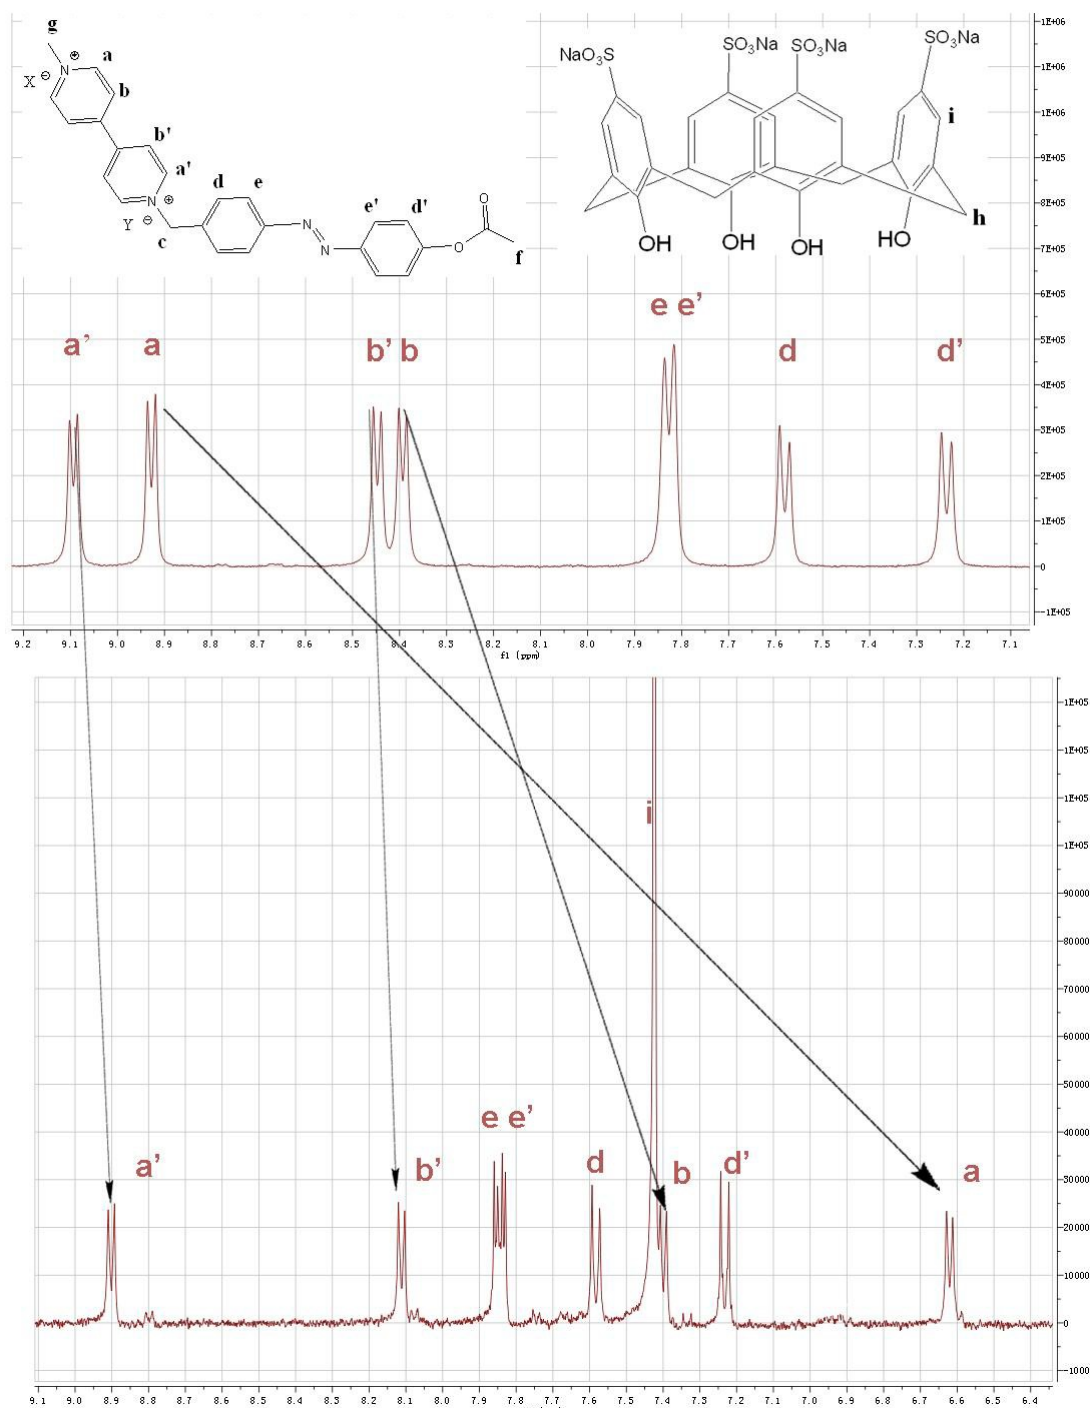

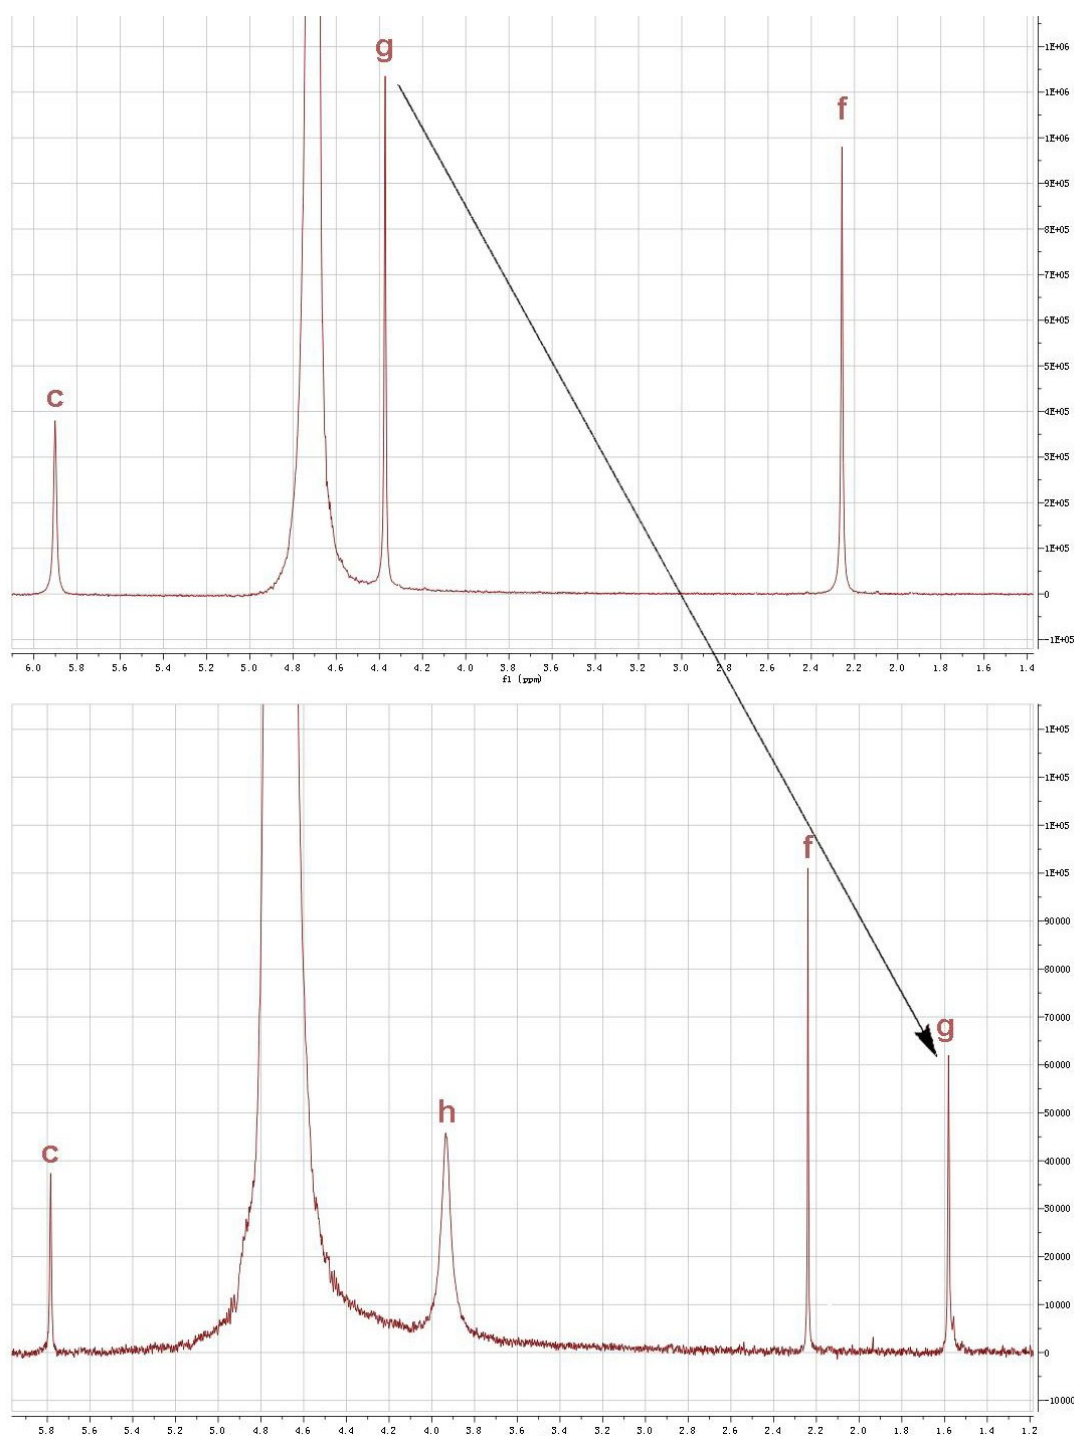

**Supplementary Figure S11 | <sup>1</sup>H NMR spectra (400MHz, D<sub>2</sub>O, 298K) changes of V<sup>2+</sup>-*trans*-Az after complexation with SC<sub>4</sub>.**

The information of inclusion complex between SC<sub>4</sub> and control guest molecules V<sup>+</sup> is evident in <sup>1</sup>H NMR spectroscopic experiment in D<sub>2</sub>O (Supplementary Fig. S12). In the presence of SC<sub>4</sub>, all the protons of guest molecule exhibit a visible upfield shift(Δδ) due to the ring current effect of the aromatic nuclei, which suggests that the V<sup>+</sup> is encapsulated into the cavity of SC<sub>4</sub>. However, the Δδ value for each proton is different, which can be used as a powerful evidence to deduce the host-guest binding manner. As can be seen from Supplementary Fig. S12 (bottom), protons on the methyl group of

pyridinium (c) perform the most significant upfield shift from  $\delta=4.28$  ppm to  $\delta=1.36$  ppm after complexation. Supplementary Fig. S12 (top) shows the chemical shift of hydrogens on the viologen moiety. The proton a'-H shifts significantly to upfield from  $\delta=8.62$  ppm to  $\delta=7.64$  ppm. The proton b'-H also shows a notable upfield shift from  $\delta=7.76$  ppm to  $\delta=6.70$  ppm. Compared to the protons a'-H and b'-H, their counterparts on the other pyridinium part of viologen moiety (a-H and b-H) show only minute upfield shift (a-H from  $\delta=8.75$  to  $\delta=8.70$ ; b-H from  $\delta=8.23$  to  $\delta=8.04$ ). The  $\Delta\delta$  value of  $V^+$  protons are in order of  $\text{CH}_3(\text{pyri},\text{c-H}) > \text{b}'\text{-H} > \text{a}'\text{-H} > \text{b-H} > \text{a-H}$ , which indicates that  $V^+$  is immersed into the cavity of  $\text{SC}_4$  in its axial orientation with the methyl pyridinium part being included first.

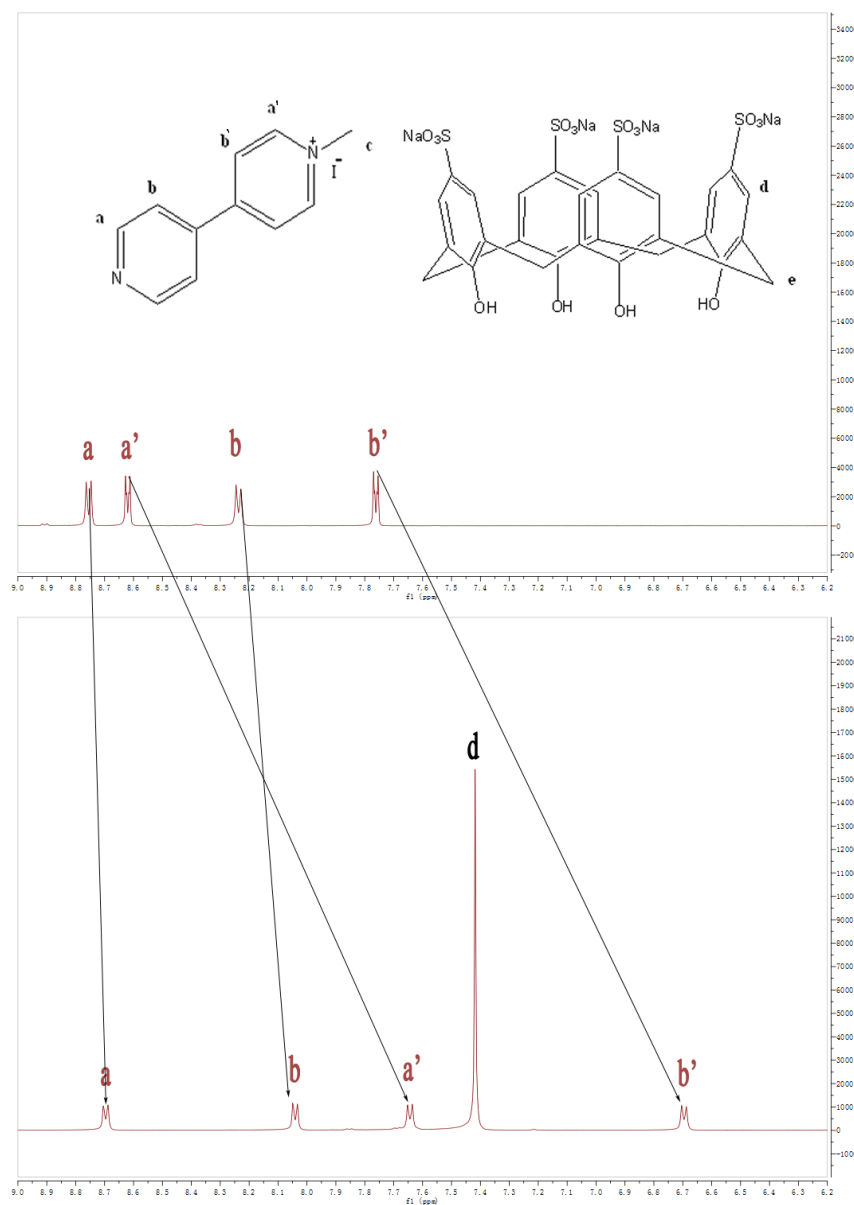

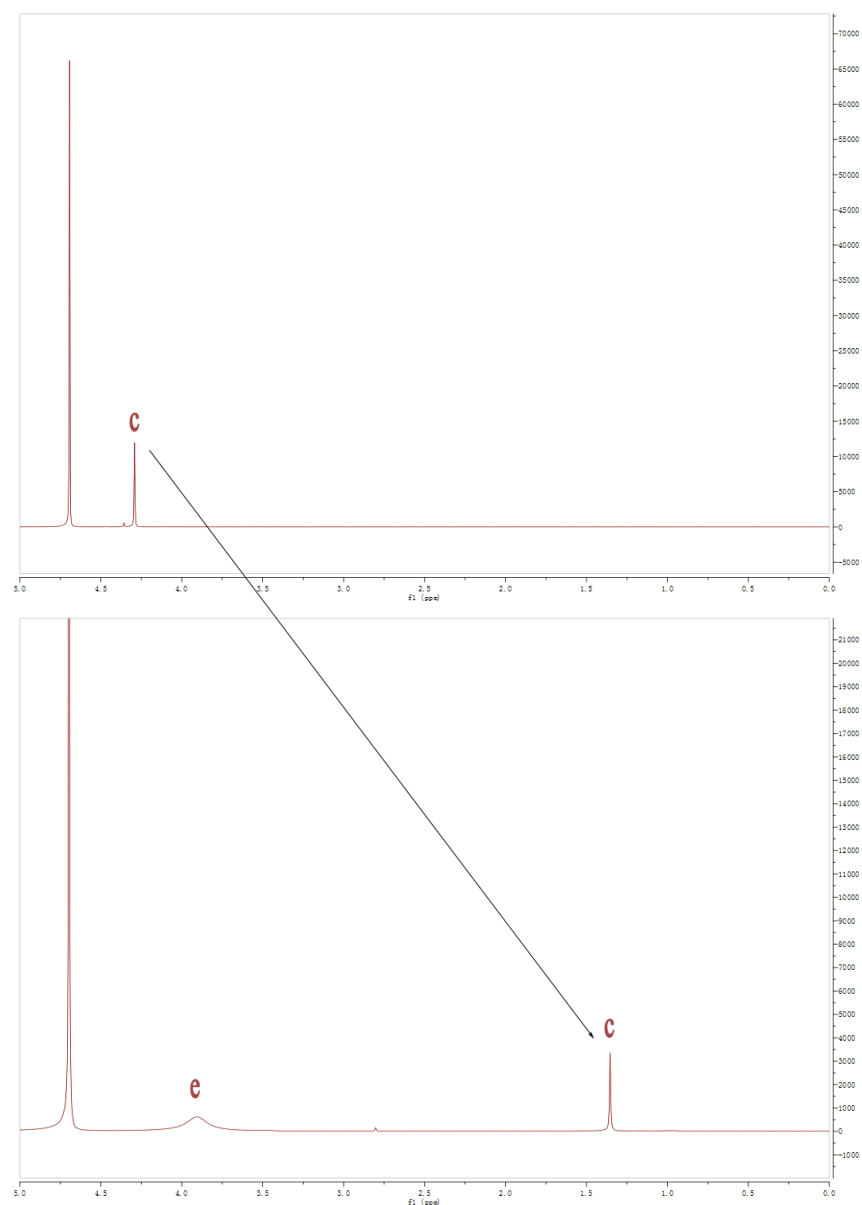

Supplementary Figure S12 |  $^1\text{H}$  NMR spectra (400MHz,  $\text{D}_2\text{O}$ , 298K) changes of  $\text{V}^+$  after complexation with  $\text{SC}_4$ .

### 3. Recognition of host-guest interactions through an $\alpha$ -HL

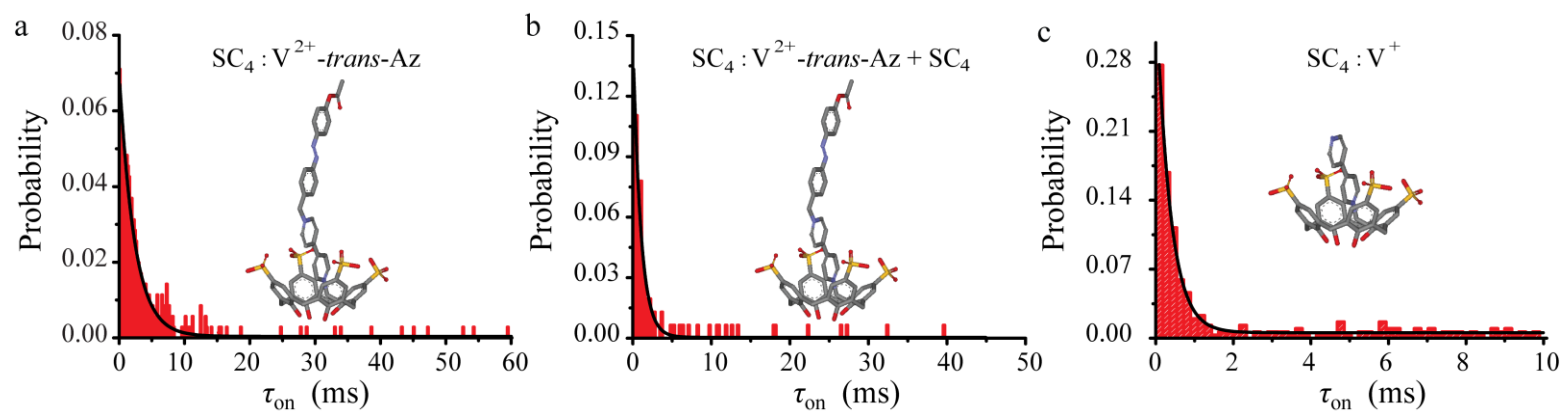

Supplementary Figure S13 |  $\tau_{\text{on}}$  histograms for the inhibitions of  $\alpha$ -HL in the presence of the host-guest complex in

the *trans* compartment at the holding potential of -140 mV: (a)  $SC_4:V^{2+}$ -*trans*-Az, (b)  $SC_4:V^{2+}$ -*trans*-Az with the addition of 1.6  $\mu$ M  $SC_4$  and (c)  $SC_4:V^+$ . The single-exponential decays are used to fit the  $\tau_{on}$  histograms.

#### 4. Binding behaviors between $SC_4$ and $V^{2+}$ -*trans*-Az/ $V^{2+}$ -*cis*-Az

As shown in Supplementary Fig. S14, the irradiation of  $V^{2+}$ -*trans*-Az with UV light ( $\lambda=365$  nm) for 30 min results in  $^1H$  NMR spectra changes attributed to the formation of  $V^{2+}$ -*cis*-Az. The protons on the azobenzene moiety show partial upfield shifts owing to the isomerization of *trans*-azobenzene to its *cis* form. The most affected protons are e-H and e'-H which sit on the ortho-position of azo bond. New bands appear at  $\delta = 6.95$ - $7.00$  of *cis* isomer compared to  $\delta = 7.82$ / $7.84$  ( $\Delta\delta = ca.0.9$ ) of the *trans* isomer. The protons on the meta-position of azo group, d-H and d'-H, also reveal a distinct partial shift from  $\delta = 7.61$ / $7.24$  (*trans*) to  $\delta = 7.37$ / $6.92$  (*cis*). Moderate upfield shift can also be observed in methylene protons (c-H) as well as acetyl methyl protons (f-H). New peaks arise in  $\delta = 5.79$  (c-H, *cis*)/  $\delta = 2.18$  (f-H, *cis*) compared to  $\delta = 5.94$  (c-H, *trans*)/  $\delta = 2.28$  (f-H, *cis*) before irradiation. However, protons on viologen moiety are hardly affected by the isomerization of azobenzene. Only a'-H, which is the most adjacent proton to azobenzene group, shows a minute and partial upfield shift from  $\delta = 9.11$  (*trans*) to  $\delta = 9.02$  (*cis*). These results demonstrate that the isomerization of azobenzene does not affect the chemical environment of protons on the viologen moiety which interact with  $SC_4$ .

The  $^1H$  NMR spectra of complex  $SC_4:V^{2+}$ -*trans*-Az before (top) and after (bottom) irradiation for 30 min ( $\lambda = 365$  nm) are represented in Supplementary Fig. S15. One can notice that protons on the viologen moiety also show partial chemical shifts. New peaks appear on  $\delta = 8.84$  (*cis* a'-H),  $\delta = 8.14$  (*cis* b'-H),  $\delta = 6.64$  (*cis* a-H), compared to  $\delta = 8.95$  (*trans* a'-H),  $\delta = 8.18$  (*trans* b'-H),  $\delta = 6.68$  (*trans* a-H), respectively. b-H is unfortunately overlapped with protons on  $SC_4$  (i-H), and thus can not be analyzed. Even the protons on the viologen methyl group, which is the complexation site with  $SC_4$  and the most distant group from the azobenzene moiety, show a partial chemical shift from  $\delta = 1.58$  (*trans*) to  $\delta = 1.55$  (*cis*). As mentioned above, the isomerization of azobenzene would not affect the chemical shifts of protons on viologen moiety except the most adjacent a'-H (Supplementary Fig. S14). Therefore, the chemical shifts of protons on viologen group associated with  $SC_4$  indicate a chemical environment change in the complex which is probably due to the perturbation of interaction between  $V^{2+}$ -*cis*-Az and  $SC_4$  through the variation of dipole moment during the isomerization.

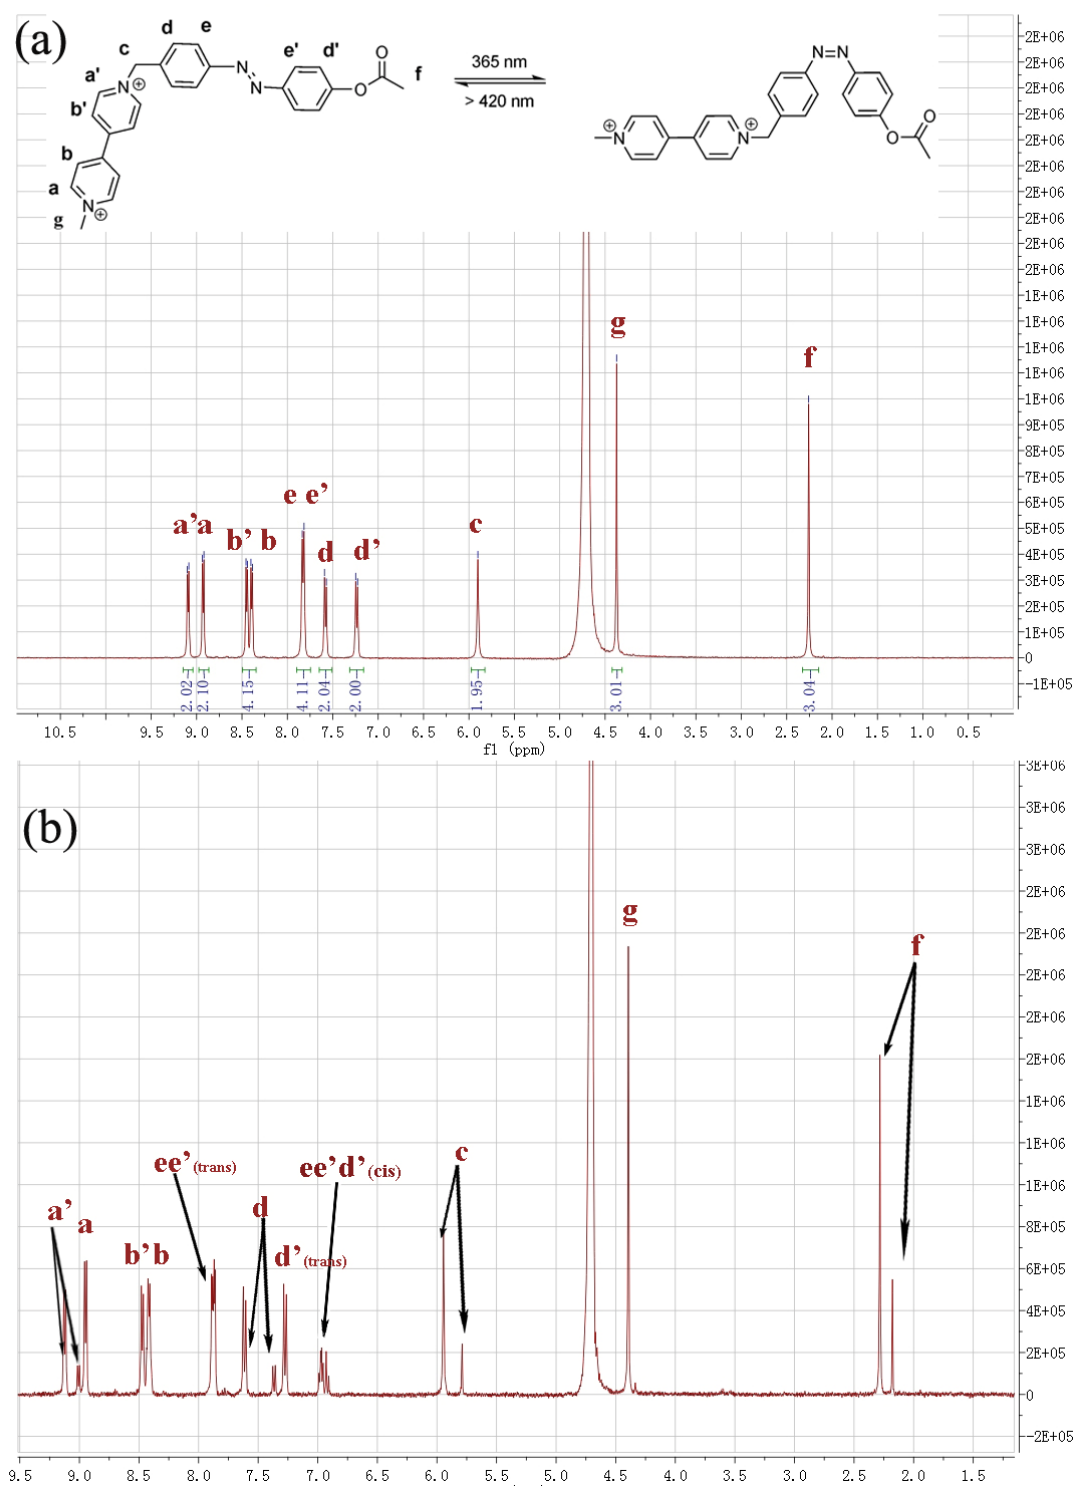

Supplementary Figure S14 |  $^1\text{H}$  NMR spectra (400MHz,  $\text{D}_2\text{O}$ , 298K) of  $\text{V}^{2+}$ -*trans*-Az and isomerization from  $\text{V}^{2+}$ -*trans*-Az to  $\text{V}^{2+}$ -*cis*-Az after irradiation. (a)  $^1\text{H}$  NMR spectrum of  $\text{V}^{2+}$ -*trans*-Az and (b)  $^1\text{H}$  NMR spectrum of  $\text{V}^{2+}$ -*trans*-Az after irradiation.



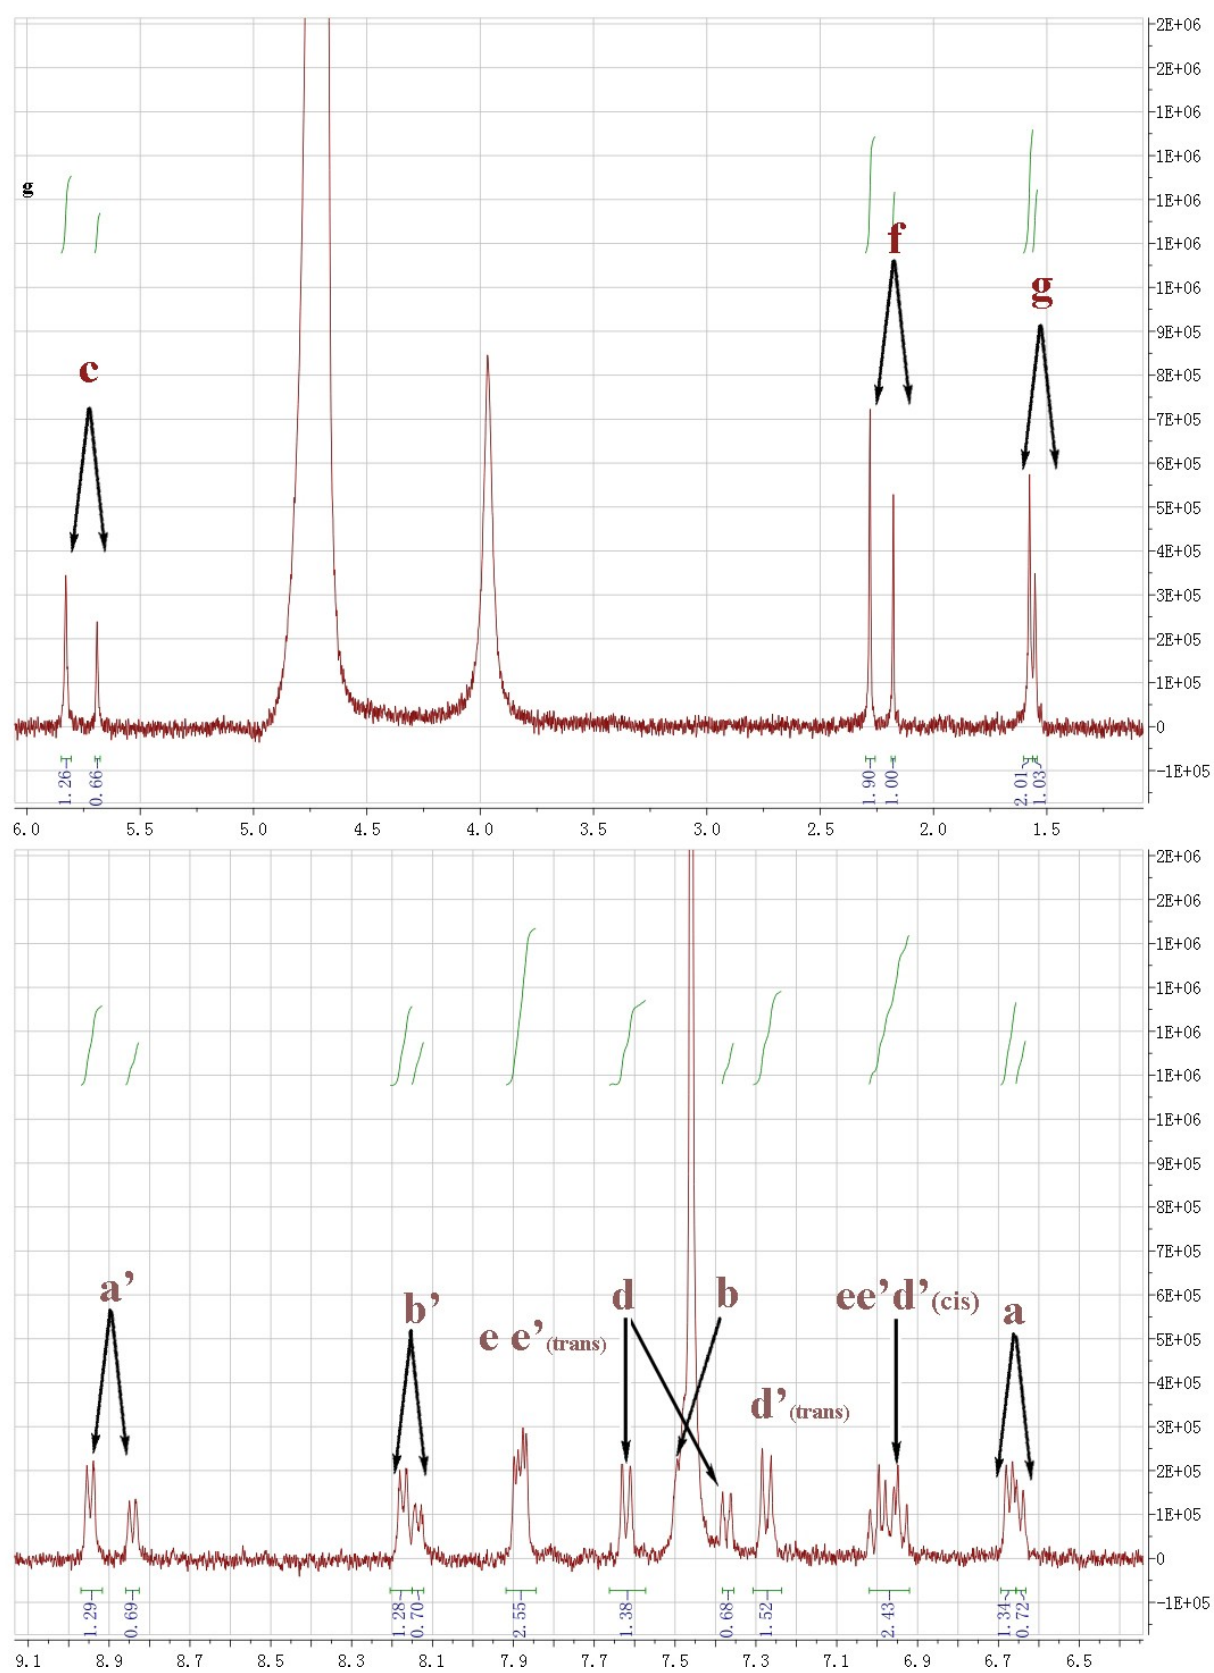

Supplementary Figure S15 |  $^1\text{H}$  NMR spectra (400MHz,  $\text{D}_2\text{O}$ , 298K) of isomerization from  $\text{SC}_4:\text{V}^{2+}$ -*trans*-Az to  $\text{SC}_4:\text{V}^{2+}$ -*cis*-Az after irradiation for 30 min.

## 5. Real-time monitoring a light-induced molecular machine by an $\alpha$ -HL: SC<sub>4</sub> system

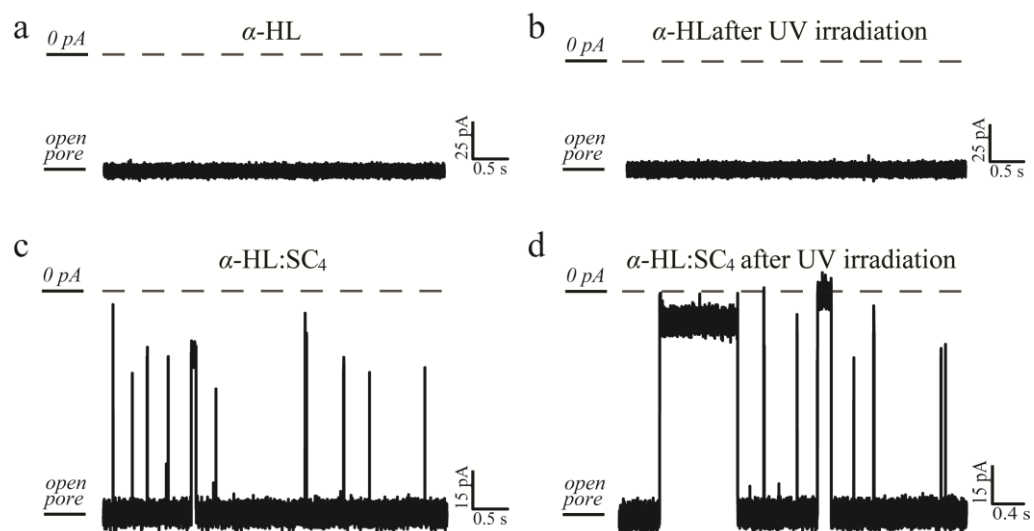

**Supplementary Figure S16 | The current traces recording at the holding potential of -100 mV: (a)  $\alpha$ -HL, (b)  $\alpha$ -HL after 2400 s UV irradiation, (c)  $\alpha$ -HL:SC<sub>4</sub> system, (d)  $\alpha$ -HL:SC<sub>4</sub> system after 2400 s UV irradiation.  $\alpha$ -HL:SC<sub>4</sub> system was formed by adding 8.0  $\mu$ M SC<sub>4</sub> into the *trans* compartment.**

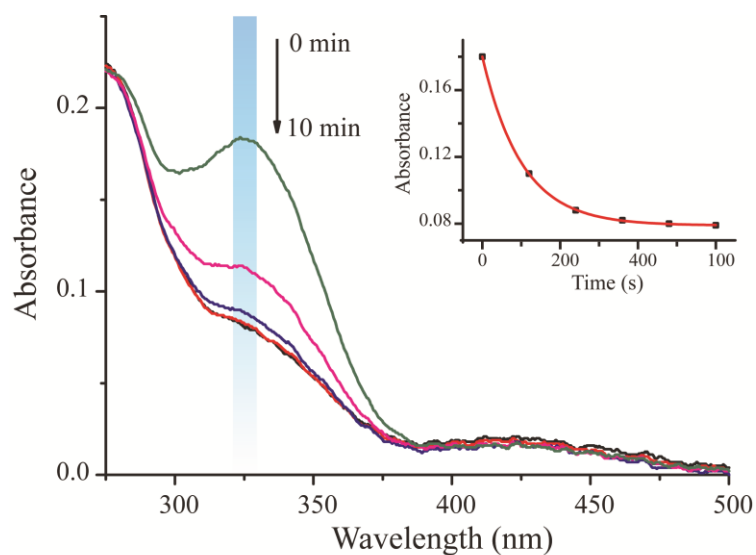

**Supplementary Figure S17 | UV-vis spectra for the photoisomerization of SC<sub>4</sub>:V<sup>2+</sup>-Az. Inset: Exponential time dependence of the changes in the UV-Vis absorption at  $\lambda = 325$  nm of SC<sub>4</sub>:V<sup>2+</sup>-Az. The decay constant ( $\tau$ ) is 101 s.**



***p*-tert-Butylcalix[4]arene or 5,11,17,23-Tetrakis(*tert*butyl)-25,26,27,28-tetrakis(hydroxy)calix[4]arene [t-C<sub>4</sub>]<sup>52</sup>**

A mixture of 31 mL (1.2 mol) of 37% formaldehyde was added to 50 g (0.3 mol) *p*-*tert*-butyl phenol in a 1 L three-necked round-bottom flask. NaOH (1.2 mL, 0.09 mmol) (40% solution in H<sub>2</sub>O) was added to the mixture. The flask was stirred uncovered at 20 °C for 15 min and then was heated to 120 °C for 2 h under a steady flow of N<sub>2</sub>. As H<sub>2</sub>O was removed, the clear solution turned from yellow to dark yellow. After 2.5 h, some frothing occurred, and the solution became more viscous. Stirring was continued until the yellow to amber viscous material did not stick to the side of the flask. The cooled very viscous solid was dissolved in 500 mL of diphenyl ether in 30 min. The dissolved solution was heated to 120 °C while N<sub>2</sub> was bubbled into the reaction mixture to facilitate the removal of H<sub>2</sub>O. After about 1 h, the solution was brought to reflux (ca. 350 °C), and the flask was fitted with a condenser. After 3 h the color of the solution changed from yellow to clear dark brown. A crude white precipitation (33.5 g, 62%) was obtained upon addition of EtOAc to the cooled reaction mixture and was filtered and washed, successively, with EtOAc (2 × 50 mL), acetic acid (100 mL), H<sub>2</sub>O (2 × 50 mL), and acetone (2 × 25 mL). Recrystallization from toluene yielded 31.1 g (50.8%) of [t-C<sub>4</sub>] as gleaming white crystals. <sup>1</sup>H NMR spectra were recorded on a Bruker AM 400 spectrometer with tetramethyl silane (TMS) as internal reference. MS were recorded on EI or ESI mass spectroscopy. <sup>1</sup>H NMR (400 MHz, CDCl<sub>3</sub>, 298K): δ 10.36 (s, 4H), δ 7.05 (s, 8H), 4.25 (d, *J* = 12.6 Hz, 4H), 3.51 (d, *J* = 12.6 Hz, 4H), 1.21 (s, 36H).

**25,26,27,28-Tetrakis(hydroxy)calix[4]arene [C<sub>4</sub>]<sup>53</sup>**

A slurry of 15.0 g (22.5 mmol) of *p*-*tert*-butylcalix[4]arene [t-C<sub>4</sub>], 10.2 g (108 mmol) of phenol, and 15.8 g (118 mmol) of AlCl<sub>3</sub> was stirred in 125 mL of toluene at 20 °C for 1 h under N<sub>2</sub>. The mixture was poured into 250 mL of 0.2 N HCl, the organic phase was separated, and the solvent was evaporated. Upon addition of MeOH the precipitate formed was filtered to give 8.5 g of a solid. The crude product was recrystallized from MeOH/CHCl<sub>3</sub> to afford colorless crystals (7.4 g, 73%). <sup>1</sup>H NMR (400 MHz, CDCl<sub>3</sub>, 298K): δ 10.20 (s, 4H), 7.05 (d, *J* = 7.6 Hz, 8H), 6.73 (t, *J* = 7.6 Hz, 4H), 4.26 (s, 1H), 3.51 (d, *J* = 23.9 Hz, 1H).

***p*-sulfonatocalix[4]arene or 5,11,17,23-Tetrakis(sulfonato)-25,26,27,28-tetrakis(hydroxy)calix[4]arene [SC<sub>4</sub>]<sup>54</sup>**

[C<sub>4</sub>] (1.0 g, 2.4 mmol) was mixed with concentrated H<sub>2</sub>SO<sub>4</sub> (10 ml) and the solution was heated at 60 °C for 4 h. An aliquot was withdrawn from the reaction mixture and poured into water. The reaction was completed when no water-insoluble material was detected in the aliquot. After cooling, the precipitate was filtered off through a glass filter. The precipitate was dissolved in water and the aqueous solution was neutralised by BaCO<sub>3</sub>. The precipitation was filtered off and washed with hot water and the combined filtrate and washings were evaporated to dryness under reduced pressure. The residue was dissolved in hot water (15 ml) and the solution was adjusted to pH 8 by Na<sub>2</sub>CO<sub>3</sub>. After filtration, methanol was added to the filtrate to afford a white precipitate (1.55g, 80%). <sup>1</sup>H NMR (400 MHz, D<sub>2</sub>O, 298K) δ 7.49 (s, 8H), 3.92 (s, 8H).

**4-hydroxyl-4'-methyl-azobenzene (A1)<sup>52</sup>**

NaNO<sub>2</sub> (52.25 g, 0.61 mol) dissolved in 387.5 mL H<sub>2</sub>O, was added dropwise into *p*-toluidine (80 g, 0.75mol) mixed with 225 mL HCl (36.5%) at 0 ~ 5°C. The final solution was kept stirring at 0°C for 15 min. Then a mixture of phenol (72 g, 0.76 mol) and 125 mL water was added dropwise into the above solution at 0 ~ 5 °C. The reaction was carried out at this temperature overnight and then NaOH was added until pH of 7–8 was achieved. A great deal of orange solid was gradually crystallized from the solution. The solid was filtered, washed with 700 mL CCl<sub>4</sub>, dried in vacuo, and then gave

out orange compound **A1** (87 g, 55%).  $^1\text{H}$  NMR (400 MHz,  $\text{CDCl}_3$ , 298K):  $\delta$  7.86 (d,  $J = 8.4$  Hz, 2H), 7.79 (d,  $J = 8.4$  Hz, 2H), 7.30 (d,  $J = 8.0$  Hz, 2H), 6.94 (d,  $J = 8.8$  Hz, 2H), 5.35 (s, 1H), 2.43 (s, 3H).

#### **4-acetoxy-4'-methyl-azobenzene (A2)**<sup>52</sup>

A stirred mixture of **A1** (20 g, 94.3 mmol) and conc. sulfuric acid (0.4 ml) dissolved into acetic anhydride (125 ml) was heated to 100 °C for 3 h under argon, cooled and poured into ice water (700 ml) slowly with stirring. The solid was filtered and dried in vacuo. Thus gave out orange compound **A2** (20.8 g, 86.7%).  $^1\text{H}$  NMR (400 MHz,  $\text{CDCl}_3$ , 298K):  $\delta$  7.94 (d,  $J = 8.4$  Hz, 2H), 7.82 (d,  $J = 8.4$  Hz, 2H), 7.32 (d,  $J = 8.4$  Hz, 2H), 7.25 (d,  $J = 8.8$  Hz, 2H), 2.45 (s, 3H), 2.35 (s, 3H).

#### **4-acetoxy-4'-bromomethyl-azobenzene (A3)**<sup>52</sup>

A mixture of **A2** (10.4 g, 40.9 mmol), NBS (7.7 g, 43.3 mmol), BPO (0.6 g, 2.4 mmol) and  $\text{CCl}_4$  (211 ml) were refluxed for 12 h under an atmosphere of Ar gas. The resulting solution was filtered while it was hot. The filtrate was cooling down to 0 °C to afford orange precipitate. The precipitate was filtered, washed with  $\text{CCl}_4$  and gave pure **A3** (10.7 g, 78.6%).  $^1\text{H}$  NMR (400 MHz,  $\text{CDCl}_3$ , 298K):  $\delta$  7.96 (d,  $J = 8.4$  Hz, 2H), 7.89 (d,  $J = 8.0$  Hz, 2H), 7.55 (d,  $J = 8.0$  Hz, 2H), 7.26 (d,  $J = 8.4$  Hz, 2H), 4.56 (s, 2H), 2.35 (s, 3H).

#### **Guest Molecule N-methyl dipyridium ( $\text{V}^+$ )**

4,4'-dipyridine (5 g, 32.05 mmol) and methyl iodide (1.52g, 10.68 mmol) was dissolved in 50 ml acetonitrile and refluxed for 5h. After cooling to room temperature, precipitates were collected and washed with cold acetonitrile (5 ml). The products were dried under vacuo and yielded 2.8 g (85%).  $^1\text{H}$  NMR (400 MHz,  $\text{D}_2\text{O}$ )  $\delta$  8.76 (d,  $J = 6.7$  Hz, 1H), 8.62 (dd,  $J = 4.7, 1.6$  Hz, 1H), 8.24 (d,  $J = 6.7$  Hz, 1H), 7.76 (dd,  $J = 4.7, 1.6$  Hz, 1H), 4.29 (s, 1H).

#### **Guest Molecule $\text{V}^{2+}$ -*trans*-Az**<sup>52</sup>

1-methyl-4,4'-bipyridin-1-ium iodide (0.45 g, 1.5 mmol) was dissolved in acetonitrile (20 mL) at 70 °C. **A3** (1.5 g, 4.5 mmol) was added into the solution and the mixture was stirred at 70 °C for overnight. After cooling to room temperature, the mixture was filtered. And then the solid was washed with  $\text{CH}_2\text{Cl}_2$  and gave a brown compound ca. 0.87g. This compound was dissolved in water (100 mL) and  $\text{NH}_4\text{PF}_6$  (10 equiv.) was added to precipitate a yellow solid. This solid was again dissolved in acetonitrile (150 mL) and TBAB (10 equiv.) was added to precipitate an orange solid. The solid was dried in vacuo and afford pure  $\text{V}^{2+}$ -*trans*-Az (0.55 g, 62.8%).  $^1\text{H}$  NMR (400 MHz,  $\text{D}_2\text{O}$ , 298K):  $\delta$  9.09 (d,  $J = 6.6$  Hz, 2H), 8.93 (d,  $J = 6.7$  Hz, 2H), 8.42 (dd,  $J = 21.6, 6.6$  Hz, 4H), 7.83 (d,  $J = 7.9$  Hz, 4H), 7.58 (d,  $J = 8.3$  Hz, 2H), 7.24 (d,  $J = 8.5$  Hz, 2H), 5.90 (s, 2H), 4.37 (s, 3H), 2.26 (s, 3H).  $^{13}\text{C}$  NMR (400 MHz,  $\text{DMSO-d}_6$ , 298K):  $\delta = 168.96, 153.04, 152.19, 149.42, 149.19, 148.10, 146.58, 145.90, 137.08, 130.23, 127.10, 126.19, 123.95, 123.14, 123.02, 62.68, 48.01, 20.89$ . MS (ESI):  $m/z$ : 424.2 [ $\text{V}^{2+}$ -*trans*-Az-2Br] $^+$ .

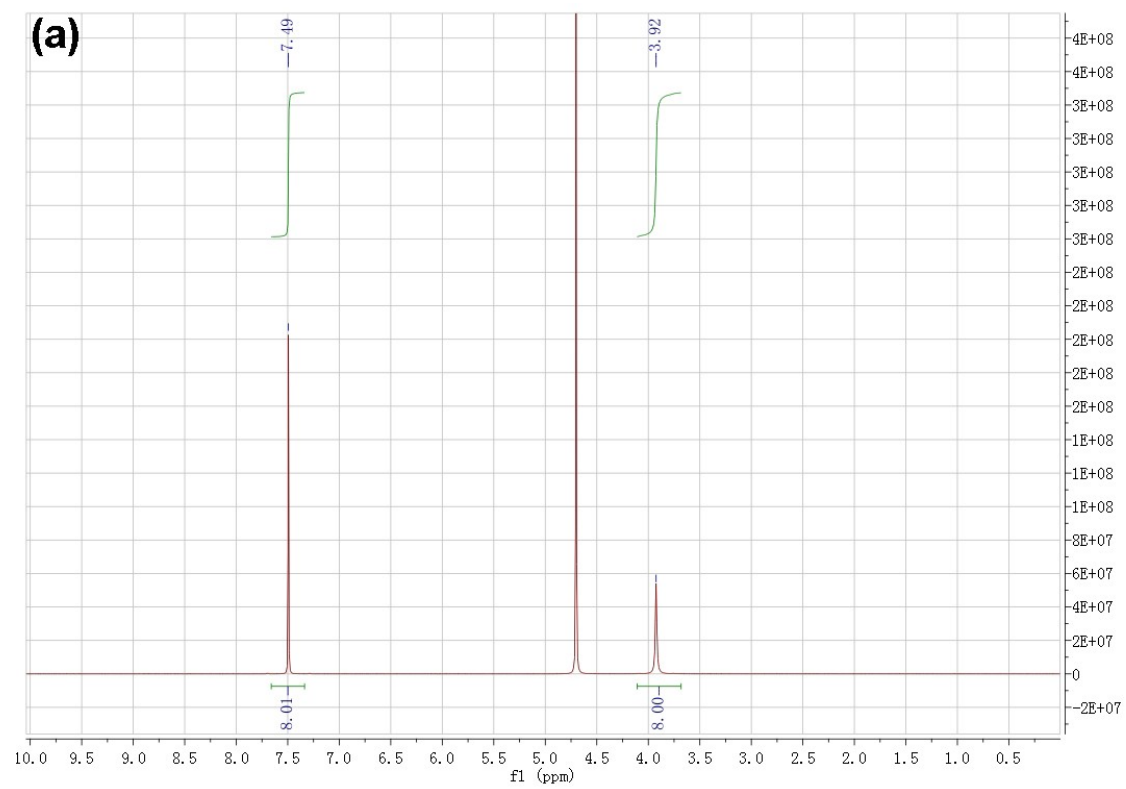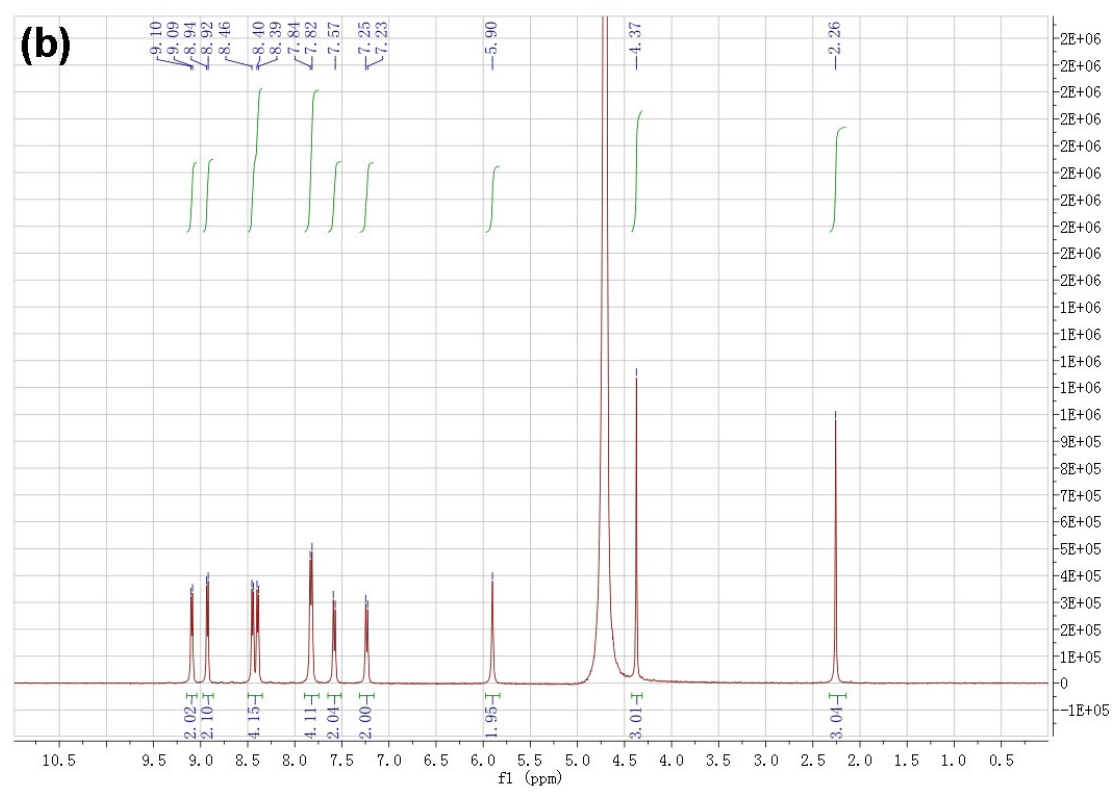

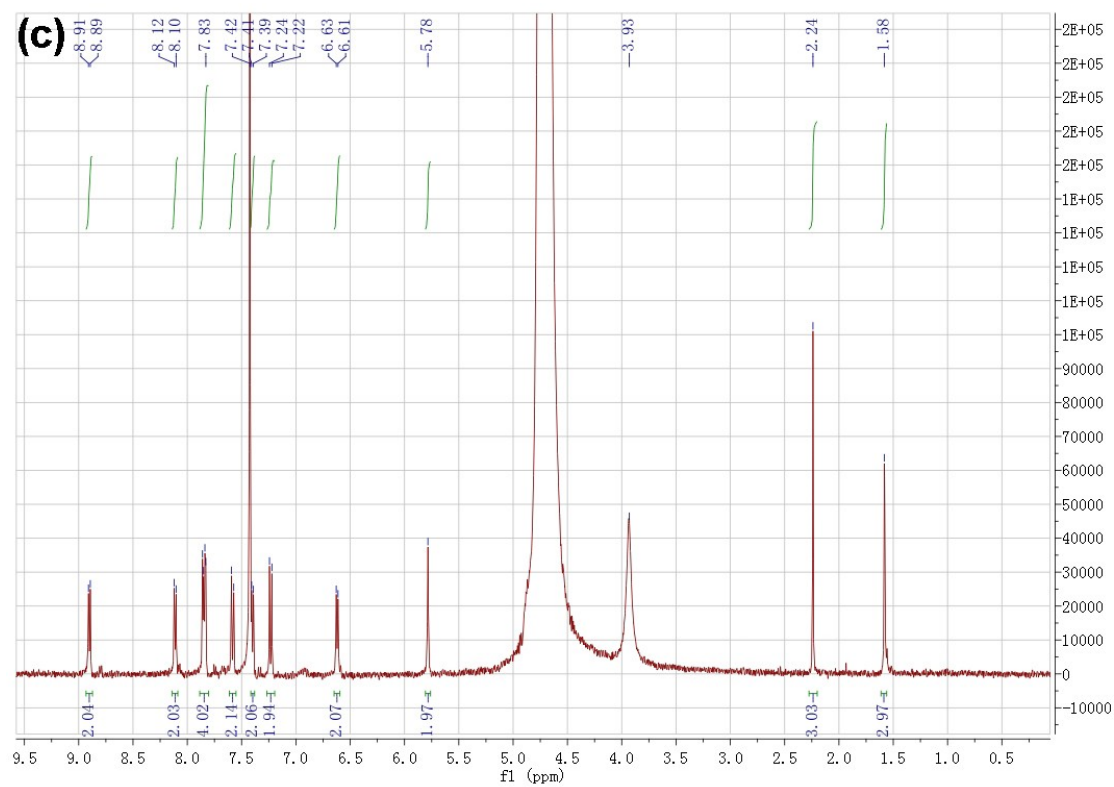

Supplementary Figure S18 |  $^1\text{H-NMR}$  spectra (400MHz,  $\text{D}_2\text{O}$ , 298K) of  $\text{SC}_4$ ,  $\text{V}^{2+}$ -*trans*-Az and  $\text{SC}_4$ :  $\text{V}^{2+}$ -*trans*-Az. (a)  $^1\text{H}$  NMR spectrum of  $\text{SC}_4$ , (b)  $^1\text{H}$  NMR spectrum of  $\text{V}^{2+}$ -*trans*-Az and (c)  $^1\text{H}$  NMR spectrum of  $\text{SC}_4$ :  $\text{V}^{2+}$ -*trans*-Az.

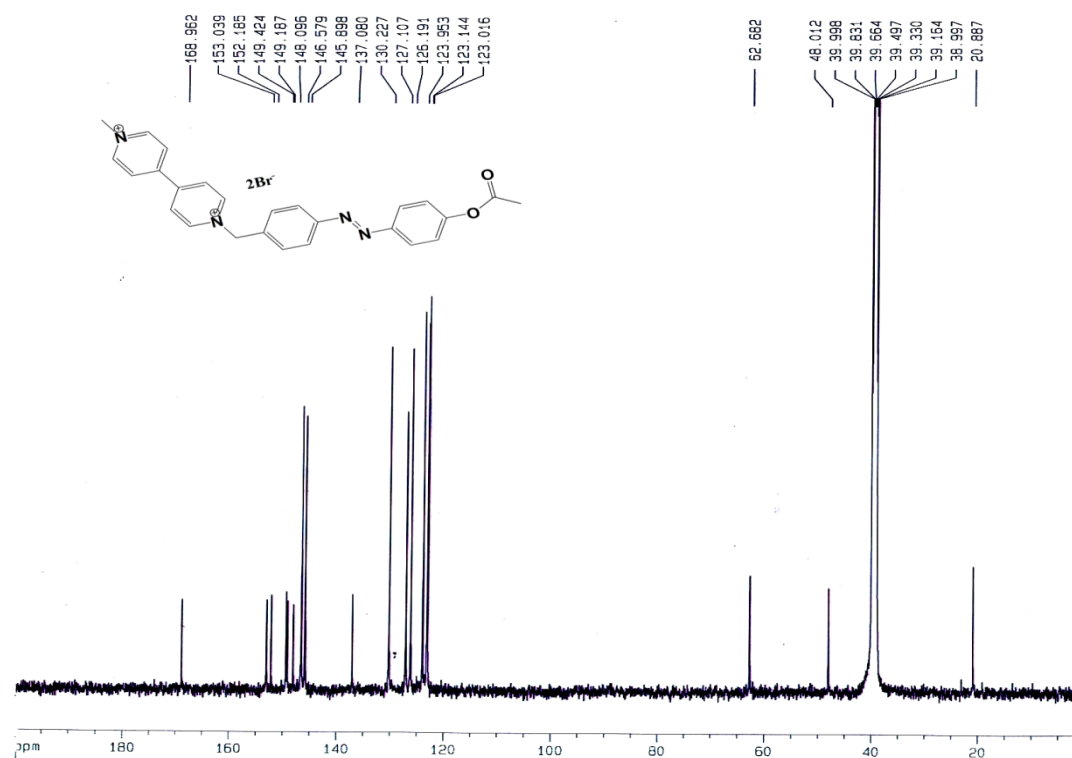

Supplementary Figure S19 |  $^{13}\text{C-NMR}$  spectrum (400MHz,  $\text{DMSO-d}_6$ , 298K) of  $\text{V}^{2+}$ -*trans*-Az.

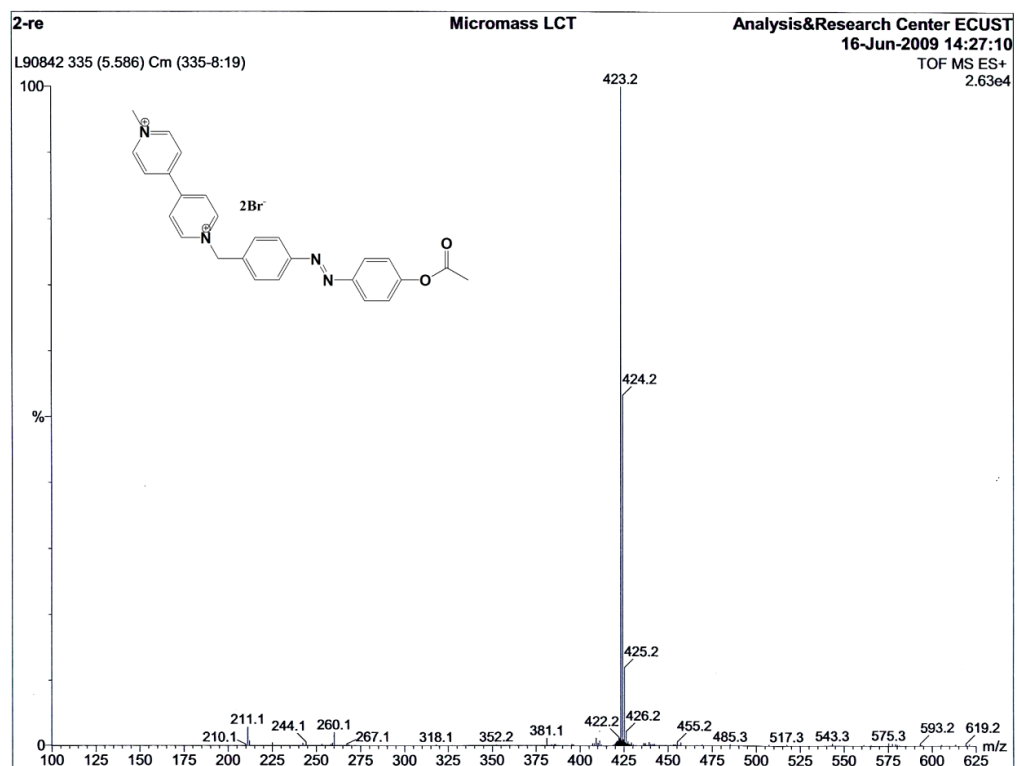

Supplementary Figure S20 | ESI-MS spectrum of  $V^{2+}$ -*trans*-Az.

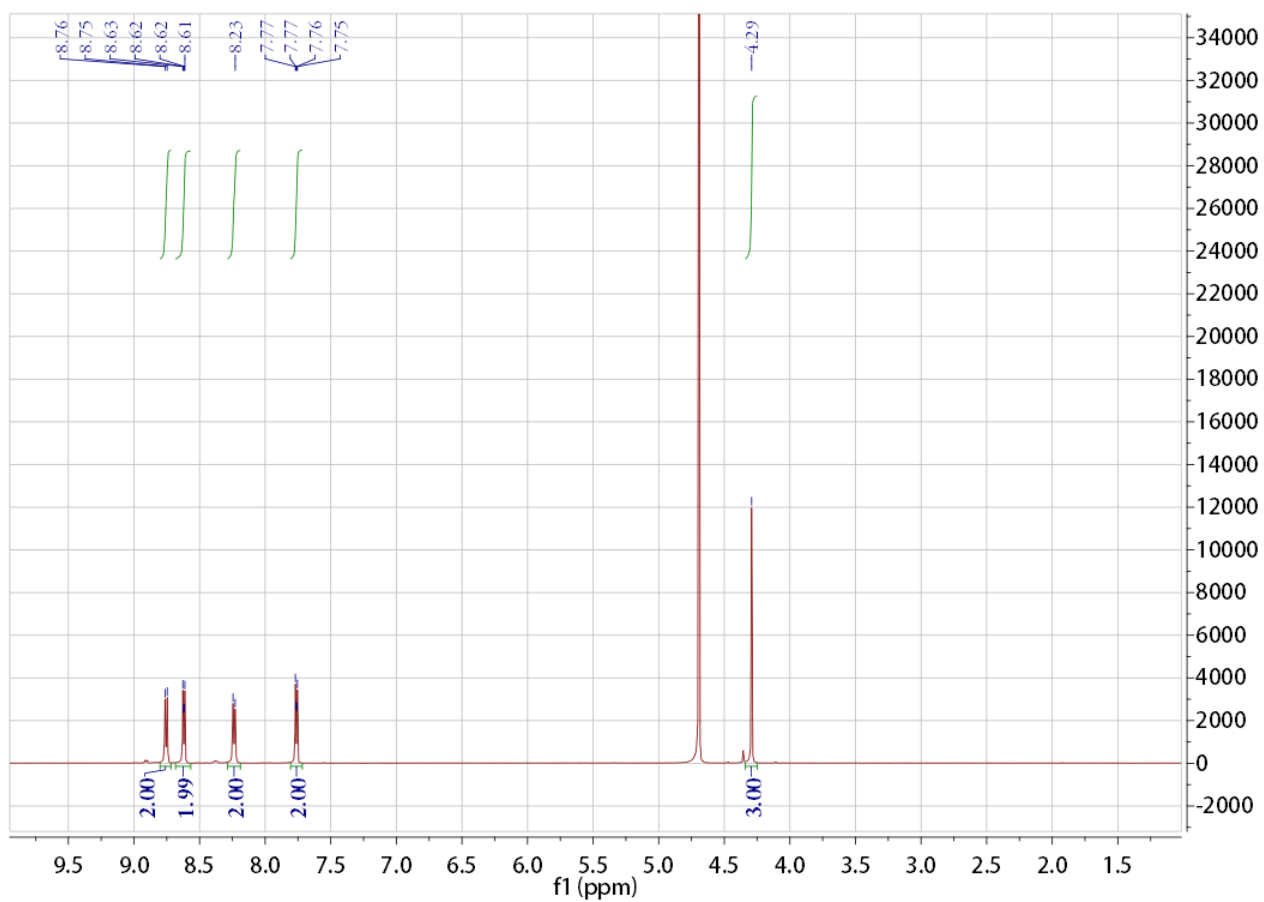

Supplementary Figure S21 |  $^1\text{H}$ -NMR spectrum (400MHz,  $\text{D}_2\text{O}$ , 298K) of  $V^+$ .



### Supplementary Reference

51. Matsumiya, H., Terazono, Y., Iki, N. & Miyano, S. Acid–base properties of sulfur-bridged calix [4] arenes. *J. Chem. Soc., Perkin Trans. 2*, 1166-1172 (2002).
52. Zhu, L. L., Zhang, D., Qu, D. H., Wang, Q. C., Ma, X., Tian, H. Dual-controllable stepwise supramolecular interconversions. *Chem. Commun.* **46**, 2587-2589 (2010).
53. Percec, V., Bera, T. K., De, B. B., Sanai, Y., Smith, J., Holerca, M. N., Barboiu, B., Grubbs, R. B., Frchet, J. M. J. Synthesis of functional aromatic multisulfonyl chlorides and their masked precursors. *J. Org. Chem.* **66**, 2104-2177 (2001).
54. Shinkai, S., Araki, K., Tsubaki, T., Arimura, T., Manabe, O. New syntheses of calixarene-*p*-sulphonates and *p*-nitrocalixarenes. *J. Chem. Soc., Perkin Trans. 1* 2297-2299 (1987).
